# Supplementary material for: International Comparative Study on PISA Mathematics Achievement Test Based on Cognitive Diagnostic Models
Source: Front Psychol. 2020 Sep 9;11:2230. doi: 10.3389/fpsyg.2020.02230 (PMC7509072; doi:10.3389/fpsyg.2020.02230)
Supplement: Supplementary file 9 [file Data_Sheet_9.CSV]

	Item1	Item2	Item3	Item4	Item5	Item6	Item7	Item8	Item9	Item10	Item11	Item12
ID1	1	0	1	1	0	0	1	0	1	0	0	0
ID2	1	1	1	1	1	0	1	0	1	1	1	1
ID3	1	1	1	1	1	1	1	0	1	1	0	1
ID4	1	1	1	1	1	0	1	0	1	0	0	0
ID5	1	1	1	1	0	1	1	1	1	1	1	0
ID6	1	1	1	1	1	1	1	1	1	1	0	1
ID7	1	0	1	1	1	1	1	1	1	1	0	1
ID8	1	0	1	1	1	1	0	0	1	1	0	0
ID9	1	1	1	1	1	1	1	0	1	0	0	1
ID10	1	0	0	1	1	0	0	0	1	1	0	1
ID11	1	1	1	1	1	1	1	1	1	1	0	0
ID12	1	1	1	1	1	1	1	1	1	1	0	1
ID13	1	1	1	1	1	1	1	1	1	1	0	1
ID14	1	1	1	1	1	1	1	0	1	1	0	1
ID15	1	1	1	1	1	1	1	1	1	1	1	1
ID16	1	1	1	1	1	1	1	1	1	1	0	1
ID17	1	1	1	1	1	1	0	1	1	1	1	1
ID18	0	1	1	1	0	1	1	0	1	1	0	1
ID19	1	1	1	1	1	1	1	1	1	1	0	1
ID20	1	0	1	1	1	1	1	1	1	1	0	0
ID21	1	1	1	1	1	1	1	1	1	1	1	1
ID22	0	0	1	1	1	0	1	0	1	0	1	1
ID23	0	1	1	1	1	1	0	0	1	1	0	1
ID24	0	0	1	1	1	0	1	0	0	0	0	1
ID25	1	0	1	1	1	1	0	0	0	1	0	1
ID26	0	1	1	1	1	0	1	0	0	0	0	0
ID27	1	0	1	1	1	1	1	1	1	1	1	0
ID28	1	1	0	1	1	1	1	1	0	1	0	1
ID29	1	1	1	1	1	1	1	1	1	1	0	1
ID30	1	1	1	0	1	1	1	0	1	1	0	1
ID31	1	1	0	0	1	1	1	1	1	1	0	1
ID32	0	0	0	1	1	0	1	1	1	1	0	0
ID33	1	0	1	0	1	0	1	0	0	1	0	0
ID34	1	1	1	1	1	1	1	1	1	1	0	1
ID35	0	1	1	1	1	1	1	0	1	1	0	1
ID36	1	1	1	0	1	1	1	0	1	1	0	1
ID37	1	1	1	1	1	1	1	0	1	1	0	0
ID38	1	1	0	1	1	1	1	0	1	1	0	0
ID39	0	1	1	1	1	1	1	1	1	1	0	0
ID40	0	0	1	1	1	1	1	1	1	1	0	0
ID41	1	1	1	1	1	1	1	0	1	1	0	1
ID42	1	1	1	1	1	1	1	0	1	1	0	1
ID43	0	0	1	0	0	0	1	0	0	1	0	0
ID44	0	1	1	1	1	1	1	0	1	1	1	1
ID45	0	1	1	1	1	1	0	0	0	1	0	0
ID46	1	1	1	1	1	1	1	1	1	0	0	0
ID47	0	0	0	0	0	0	0	0	1	0	0	0
ID48	1	0	1	1	1	1	1	0	1	1	0	1
ID49	0	0	1	0	1	1	0	0	0	1	0	1
ID50	1	1	1	1	1	1	1	1	1	1	0	1
ID51	1	0	0	1	0	1	0	0	1	1	0	0
ID52	1	1	1	1	1	1	1	0	1	1	1	1
ID53	1	1	1	1	1	1	1	0	1	1	0	1
ID54	1	0	1	1	1	1	1	1	1	1	0	1
ID55	1	0	1	0	1	1	0	0	0	0	0	1
ID56	1	1	1	1	1	1	0	0	0	0	0	1
ID57	1	0	1	1	1	1	1	0	1	1	0	1
ID58	0	0	1	1	1	0	1	0	1	0	0	0
ID59	1	1	1	1	1	1	1	0	1	0	0	0
ID60	0	0	1	1	0	0	1	0	1	1	0	1
ID61	0	0	1	1	0	0	0	0	0	0	0	0
ID62	0	1	1	1	1	0	0	0	0	0	0	1
ID63	0	0	1	0	0	0	0	0	0	0	0	1
ID64	1	1	1	1	1	1	1	0	1	1	0	1
ID65	0	0	1	0	1	1	0	0	0	1	0	0
ID66	1	0	1	1	0	0	0	0	0	1	0	1
ID67	1	1	1	1	1	1	1	1	1	1	0	1
ID68	1	0	1	1	1	1	1	0	1	0	0	1
ID69	0	0	1	0	0	0	0	0	0	1	0	0
ID70	1	1	1	1	1	1	1	0	1	1	0	1
ID71	1	1	1	1	0	1	1	1	1	1	0	1
ID72	0	0	1	1	0	1	1	0	0	1	0	0
ID73	0	0	1	0	1	0	0	0	0	0	0	0
ID74	0	0	0	1	1	0	1	1	1	1	0	1
ID75	0	0	1	1	1	1	1	0	1	1	0	1
ID76	1	1	1	1	1	1	1	1	1	1	0	1
ID77	1	1	1	1	1	1	1	1	1	1	0	1
ID78	1	1	1	1	1	1	1	1	1	1	0	1
ID79	1	0	1	1	1	1	1	0	1	1	0	1
ID80	1	1	1	1	1	1	1	0	1	1	0	1
ID81	1	1	1	1	1	1	1	1	1	1	0	1
ID82	1	1	1	1	1	1	1	1	1	1	1	1
ID83	1	0	1	1	1	0	0	0	1	0	0	0
ID84	1	1	1	1	1	1	1	1	0	1	1	1
ID85	1	1	1	1	1	1	1	1	1	1	0	1
ID86	0	1	1	1	1	1	0	0	1	1	0	1
ID87	1	0	1	0	0	0	1	1	0	0	0	0
ID88	0	1	1	0	1	0	1	1	1	1	0	1
ID89	0	1	1	1	1	0	0	0	0	0	1	0
ID90	1	1	1	1	1	1	1	1	1	1	0	1
ID91	1	0	1	1	1	1	1	0	0	1	0	1
ID92	1	1	1	1	1	1	1	1	0	1	0	1
ID93	1	1	1	1	1	1	1	0	1	1	0	1
ID94	1	1	0	1	1	1	1	1	1	1	0	1
ID95	0	1	1	0	1	1	0	0	0	0	0	0
ID96	1	1	1	1	1	1	1	1	1	1	0	1
ID97	1	1	1	1	1	1	1	1	1	1	0	1
ID98	0	1	0	0	1	0	1	0	1	1	0	1
ID99	0	0	1	0	0	0	1	0	1	0	0	0
ID100	1	1	1	1	1	0	0	0	1	1	0	0
ID101	0	0	1	1	1	1	1	1	1	0	0	0
ID102	0	1	1	1	1	1	1	1	1	1	0	1
ID103	0	0	1	0	1	0	0	0	0	1	0	0
ID104	1	0	1	1	1	1	1	0	1	1	0	1
ID105	0	0	0	0	0	0	0	0	0	0	0	0
ID106	1	1	1	1	1	1	1	1	1	1	1	0
ID107	1	1	1	1	1	1	1	1	1	1	0	1
ID108	1	1	0	1	0	1	1	0	0	0	0	0
ID109	0	0	1	1	1	1	1	1	1	1	0	1
ID110	0	0	1	1	1	0	0	0	1	0	0	0
ID111	1	1	1	1	1	1	1	1	1	1	0	0
ID112	0	1	1	1	1	1	1	1	1	1	0	0
ID113	0	1	1	1	1	0	1	0	1	1	0	0
ID114	1	0	1	1	1	1	1	0	1	0	0	1
ID115	0	0	0	0	0	0	0	0	1	0	0	1
ID116	0	1	0	0	0	1	1	0	1	1	0	0
ID117	0	1	1	1	0	1	1	1	1	1	0	1
ID118	0	1	1	1	1	1	1	1	1	1	0	1
ID119	1	1	1	0	0	0	1	1	1	0	0	0
ID120	0	0	1	1	1	1	0	0	0	1	0	0
ID121	1	1	1	1	0	1	1	0	1	1	0	1
ID122	1	1	1	1	1	1	1	1	1	1	0	1
ID123	0	1	1	1	1	1	1	1	1	1	0	1
ID124	1	1	1	1	1	1	0	0	1	1	0	1
ID125	1	1	1	1	1	1	1	1	0	1	0	1
ID126	1	0	1	1	1	1	1	1	1	1	1	1
ID127	1	1	1	1	1	1	1	1	1	0	0	1
ID128	1	1	1	1	1	0	1	1	1	1	0	1
ID129	1	1	1	1	1	1	1	0	1	1	0	1
ID130	1	1	1	1	1	1	1	0	1	1	0	1
ID131	1	1	0	1	1	1	1	0	1	1	0	0
ID132	1	1	1	1	1	1	1	1	1	1	0	1
ID133	1	1	1	1	1	1	1	1	1	1	0	1
ID134	1	1	1	1	1	1	1	0	1	1	0	0
ID135	1	1	1	1	1	1	0	0	1	1	0	1
ID136	1	1	1	1	1	1	1	1	1	1	0	1
ID137	1	1	1	1	0	1	1	0	1	1	0	1
ID138	0	0	1	1	1	1	1	0	1	1	0	0
ID139	0	1	1	1	1	1	1	0	1	0	0	0
ID140	0	1	1	1	1	0	1	0	1	1	0	0
ID141	1	1	1	1	1	1	1	1	1	0	0	1
ID142	0	1	1	1	1	1	1	1	1	0	0	1
ID143	1	1	1	1	1	1	1	1	1	1	0	1
ID144	1	1	1	1	1	1	1	0	1	1	1	1
ID145	0	0	1	0	1	1	0	0	1	0	0	0
ID146	0	1	1	1	1	1	1	0	0	0	0	0
ID147	1	1	1	1	1	1	1	0	1	1	0	1
ID148	0	1	1	1	1	1	1	0	1	1	0	1
ID149	1	1	1	1	1	0	1	1	1	1	0	0
ID150	1	0	1	1	1	1	1	0	1	1	1	0
ID151	0	0	1	1	1	0	1	1	1	0	0	1
ID152	0	0	1	1	1	1	0	0	1	1	0	0
ID153	1	0	0	1	1	1	1	1	1	1	0	0
ID154	1	0	1	1	1	1	0	1	0	1	0	0
ID155	0	0	1	0	1	0	0	0	0	1	0	0
ID156	1	0	1	1	1	1	1	1	1	0	0	0
ID157	1	1	1	1	1	1	1	0	1	1	0	0
ID158	1	0	1	1	1	0	1	0	0	0	0	1
ID159	1	0	1	1	1	0	1	0	0	0	0	0
ID160	0	0	0	1	1	0	0	0	0	0	1	0
ID161	0	0	1	0	1	0	1	0	1	0	0	0
ID162	0	0	1	0	1	0	1	0	0	0	0	0
ID163	1	1	1	0	1	1	1	0	1	1	0	1
ID164	0	0	1	1	1	1	0	0	0	1	0	0
ID165	1	1	0	1	1	1	1	0	0	0	0	1
ID166	0	0	1	1	1	0	1	0	1	1	0	0
ID167	0	1	1	1	1	1	1	0	0	0	0	1
ID168	0	1	1	1	0	1	1	0	1	1	0	1
ID169	0	1	1	1	1	0	0	0	0	0	0	0
ID170	0	1	1	1	1	1	1	1	1	1	1	1
ID171	0	0	1	1	1	1	1	1	1	1	0	0
ID172	0	1	1	1	1	0	0	0	1	1	0	0
ID173	0	0	1	1	1	0	1	0	1	1	0	0
ID174	0	1	0	1	1	1	1	1	1	1	0	1
ID175	0	1	0	1	0	1	1	0	0	0	0	1
ID176	1	1	1	0	0	0	0	0	1	1	0	1
ID177	1	1	1	1	1	1	1	0	1	1	0	0
ID178	0	1	1	1	1	1	1	0	0	1	0	1
ID179	0	1	1	1	1	1	1	0	0	1	0	0
ID180	1	1	1	1	1	1	1	1	1	0	0	1
ID181	0	0	1	1	0	1	0	0	0	0	0	0
ID182	1	1	1	1	1	0	1	0	1	1	0	1
ID183	0	0	1	0	1	1	0	0	0	0	0	0
ID184	1	0	1	1	1	1	1	0	1	1	0	1
ID185	0	0	1	1	1	0	0	0	0	0	0	0
ID186	1	1	1	1	1	0	0	0	0	1	0	0
ID187	0	1	1	1	1	1	1	0	0	1	0	1
ID188	1	1	1	1	1	1	1	1	1	1	0	1
ID189	1	0	0	1	1	1	1	1	0	0	1	1
ID190	1	1	1	0	1	1	0	0	1	1	0	0
ID191	1	0	1	1	1	1	1	0	1	1	0	1
ID192	1	0	1	1	1	0	1	0	1	1	0	1
ID193	1	1	0	1	1	1	1	0	1	1	0	0
ID194	1	1	1	0	1	1	1	0	1	1	1	1
ID195	1	1	1	1	1	1	1	0	1	0	0	0
ID196	0	1	1	1	1	1	1	0	1	1	0	0
ID197	1	0	1	1	1	1	1	0	1	1	0	0
ID198	1	1	1	1	1	1	1	1	1	1	0	1
ID199	1	1	1	1	1	1	1	1	1	1	0	0
ID200	1	1	1	1	0	1	1	1	1	1	1	0
ID201	1	1	1	1	1	0	1	0	1	1	0	1
ID202	0	0	1	1	1	0	1	0	0	1	0	0
ID203	1	0	1	1	1	1	1	1	1	1	1	1
ID204	1	1	1	1	1	1	1	1	1	1	1	0
ID205	0	0	1	0	1	0	0	0	0	1	0	1
ID206	0	0	0	0	1	0	0	0	0	0	0	0
ID207	1	0	1	1	1	1	1	0	1	1	0	1
ID208	1	1	1	1	1	1	1	0	0	1	0	0
ID209	0	1	0	1	1	1	1	1	1	1	0	0
ID210	1	1	1	1	1	1	1	0	1	1	0	0
ID211	0	1	1	1	0	1	1	0	0	1	0	0
ID212	0	1	1	1	1	0	1	0	1	0	1	0
ID213	1	0	1	1	1	1	0	0	0	1	0	1
ID214	0	1	1	1	1	1	1	1	1	1	0	1
ID215	0	0	0	0	1	0	0	0	1	0	0	1
ID216	0	0	0	1	1	0	0	0	1	1	0	0
ID217	0	0	1	0	1	0	1	0	1	1	0	1
ID218	0	0	1	1	1	0	0	0	0	0	0	0
ID219	0	1	1	1	1	1	1	1	1	1	0	1
ID220	0	0	1	0	1	0	1	0	1	1	0	0
ID221	0	0	1	1	1	0	0	0	0	1	0	0
ID222	0	1	1	1	1	0	1	0	1	0	0	0
ID223	0	0	1	1	1	0	1	1	0	0	0	1
ID224	0	0	1	0	0	0	0	0	0	0	0	0
ID225	0	1	1	1	1	1	1	1	1	1	0	1
ID226	0	0	0	1	0	0	1	0	0	1	0	0
ID227	0	1	1	1	0	0	0	0	1	0	0	1
ID228	1	1	1	1	1	1	1	1	1	1	1	0
ID229	0	0	1	1	0	0	0	0	0	0	0	0
ID230	1	1	1	1	1	1	0	0	0	0	0	0
ID231	1	1	1	1	1	1	1	1	1	1	0	0
ID232	1	0	1	1	1	0	1	0	1	1	0	1
ID233	1	0	1	1	1	0	1	0	1	1	0	1
ID234	1	1	1	1	1	1	1	1	1	1	0	0
ID235	1	1	1	1	1	1	1	1	1	1	1	1
ID236	1	1	1	1	1	1	1	0	0	1	0	1
ID237	1	1	1	1	1	1	1	1	1	0	1	0
ID238	1	1	1	1	0	1	1	1	1	1	1	1
ID239	0	1	1	1	1	1	0	0	1	1	0	1
ID240	1	1	0	1	1	1	1	1	1	0	0	1
ID241	1	1	1	1	1	1	1	0	1	1	1	1
ID242	1	1	1	1	1	1	1	1	1	1	0	1
ID243	1	1	1	1	1	1	0	1	1	1	0	1
ID244	1	1	1	0	1	1	1	1	1	1	1	0
ID245	0	1	1	1	0	1	1	0	1	1	1	0
ID246	0	0	1	1	1	0	0	0	1	1	0	0
ID247	1	1	1	1	1	1	1	0	1	1	0	1
ID248	0	0	1	1	1	1	1	0	0	1	0	0
ID249	0	0	1	1	1	1	1	0	1	0	0	0
ID250	1	1	1	1	1	0	1	0	0	1	0	1
ID251	0	0	1	1	0	1	0	1	0	0	0	0
ID252	0	1	0	1	1	0	1	0	1	0	0	0
ID253	1	1	1	1	1	1	1	1	1	1	0	1
ID254	1	1	1	1	1	0	0	0	0	1	0	1
ID255	1	0	1	1	1	1	1	0	0	1	0	1
ID256	1	1	1	1	1	1	1	0	1	1	1	0
ID257	1	0	1	1	1	1	0	0	1	1	0	1
ID258	1	1	1	1	1	1	0	1	1	1	0	1
ID259	0	1	1	1	1	0	1	0	0	0	0	1
ID260	1	0	1	1	1	1	1	0	1	1	0	1
ID261	1	1	1	0	1	1	0	1	1	1	0	1
ID262	0	0	1	0	1	1	1	0	0	0	0	0
ID263	1	1	1	1	1	0	1	0	1	1	1	1
ID264	1	0	1	1	1	0	0	0	1	0	0	0
ID265	0	0	0	0	0	0	0	0	1	0	0	0
ID266	1	1	1	1	0	1	1	1	1	0	0	1
ID267	1	1	1	1	1	1	1	0	1	1	0	1
ID268	1	0	1	1	1	1	1	0	1	1	0	1
ID269	0	0	1	1	1	1	0	0	1	0	0	0
ID270	0	1	1	1	1	1	1	1	1	1	1	1
ID271	0	0	1	1	1	0	0	0	0	0	0	0
ID272	0	1	1	1	1	1	1	0	1	1	0	1
ID273	0	1	1	1	1	0	0	0	0	1	0	1
ID274	1	0	1	1	1	1	0	0	0	1	0	0
ID275	1	1	0	1	1	0	1	0	1	1	0	1
ID276	1	1	1	1	1	1	1	1	1	1	0	0
ID277	1	1	1	1	1	1	0	1	1	1	1	1
ID278	0	0	1	1	1	1	1	0	1	0	0	1
ID279	0	0	1	1	1	0	0	0	1	0	0	0
ID280	1	0	0	1	1	0	0	0	0	0	0	0
ID281	1	1	1	1	1	0	1	0	1	1	0	0
ID282	1	0	1	1	1	1	1	1	1	1	0	1
ID283	1	1	0	1	1	1	1	1	1	1	0	1
ID284	0	1	0	1	0	0	1	0	0	0	0	1
ID285	1	1	1	1	1	1	1	1	1	1	0	1
ID286	1	1	1	1	1	1	1	0	1	1	0	1
ID287	1	1	1	1	1	1	1	1	1	1	0	1
ID288	1	1	1	1	1	1	1	0	1	1	0	0
ID289	0	1	1	1	1	1	1	1	1	0	1	1
ID290	1	1	1	1	1	1	1	1	1	1	0	0
ID291	1	1	1	1	1	1	1	0	1	1	1	1
ID292	1	1	1	1	1	1	1	1	0	1	0	1
ID293	1	1	1	1	1	1	1	0	1	1	0	1
ID294	0	1	0	1	1	1	1	0	1	1	0	1
ID295	0	1	1	1	1	1	1	0	0	1	0	1
ID296	1	0	1	1	1	1	0	1	1	0	0	0
ID297	0	0	1	1	1	1	1	0	1	0	0	1
ID298	0	1	1	1	1	1	0	0	0	1	0	1
ID299	1	1	1	1	1	1	1	0	1	1	0	1
ID300	0	0	0	1	1	0	1	0	1	1	0	1
ID301	1	1	1	1	1	1	1	0	1	1	0	1
ID302	1	1	1	1	1	1	1	1	1	1	0	1
ID303	1	1	1	1	1	1	1	1	1	1	0	1
ID304	1	1	1	1	1	1	1	1	1	1	0	1
ID305	1	1	1	1	1	1	1	1	1	1	1	1
ID306	1	1	1	1	1	1	1	1	1	1	1	1
ID307	1	1	1	1	1	1	1	1	1	1	1	1
ID308	1	1	1	1	0	1	1	1	1	1	0	1
ID309	1	1	1	1	1	1	1	1	1	1	1	1
ID310	1	1	0	1	0	1	1	0	1	1	0	1
ID311	0	0	1	1	1	0	0	0	1	1	0	0
ID312	1	1	1	1	1	1	1	0	1	1	0	1
ID313	1	1	1	1	1	1	1	0	1	1	0	1
ID314	0	0	1	0	0	1	1	0	1	1	0	1
ID315	0	0	1	1	0	0	0	0	0	0	0	0
ID316	1	1	1	1	1	1	1	1	1	1	0	1
ID317	1	1	1	1	1	1	1	0	0	1	0	0
ID318	1	0	1	0	1	1	0	0	1	1	0	1
ID319	0	0	1	1	1	0	0	0	1	0	0	0
ID320	1	1	1	1	1	1	1	1	1	1	0	1
ID321	0	0	0	1	1	0	0	0	0	1	0	0
ID322	1	1	1	1	1	1	1	1	1	1	0	1
ID323	0	0	1	0	0	0	0	0	0	0	0	0
ID324	0	0	1	1	1	1	1	1	1	1	0	1
ID325	1	1	1	1	1	1	1	1	1	1	0	1
ID326	0	1	1	1	1	1	1	1	1	1	0	0
ID327	0	1	1	1	1	1	0	0	1	1	0	0
ID328	1	1	1	1	0	1	1	0	0	1	1	0
ID329	0	0	1	1	1	0	1	0	1	1	0	1
ID330	0	1	1	1	1	0	0	0	0	1	0	0
ID331	0	0	1	1	1	1	1	1	0	0	0	1
ID332	1	1	1	1	1	1	1	1	1	1	0	1
ID333	0	0	1	1	1	0	1	0	1	0	0	1
ID334	1	1	1	1	1	1	1	0	1	1	0	1
ID335	1	1	1	1	1	1	1	0	1	0	0	1
ID336	1	1	1	1	1	1	1	0	1	1	0	1
ID337	1	0	1	1	1	0	1	1	0	1	0	0
ID338	1	1	1	1	1	1	1	1	1	1	0	1
ID339	0	0	0	0	0	0	0	0	0	0	0	0
ID340	0	0	1	1	1	0	1	0	1	0	0	0
ID341	1	1	1	1	1	1	1	1	1	1	1	1
ID342	1	1	1	1	1	1	1	1	1	1	0	1
ID343	1	1	1	1	1	1	1	1	1	1	0	1
ID344	1	0	1	0	1	0	0	0	1	1	0	0
ID345	1	0	1	1	1	1	1	1	1	1	1	1
ID346	1	1	0	1	1	1	1	0	1	1	0	1
ID347	1	0	1	1	1	1	1	1	1	1	0	0
ID348	0	0	1	1	1	1	1	1	0	1	0	1
ID349	1	0	1	1	1	1	1	0	1	1	0	1
ID350	0	0	1	1	1	1	1	0	1	0	0	0
ID351	1	1	0	1	1	1	1	1	1	1	1	1
ID352	1	1	1	0	1	1	1	1	1	1	1	1
ID353	1	1	1	1	1	1	1	0	1	1	0	1
ID354	1	1	1	1	1	1	1	1	1	1	0	0
ID355	0	0	1	1	1	1	1	0	1	1	0	1
ID356	0	0	1	1	1	1	1	0	1	1	0	1
ID357	1	1	1	1	1	1	1	1	1	1	1	1
ID358	1	0	1	1	1	1	1	0	1	1	1	1
ID359	1	1	1	1	1	1	1	1	1	1	0	1
ID360	1	1	1	1	1	1	1	1	1	1	0	1
ID361	1	1	1	1	1	1	1	1	1	1	0	0
ID362	1	1	1	1	1	1	1	1	1	1	0	1
ID363	1	1	0	1	1	1	1	1	1	1	1	1
ID364	0	1	1	1	1	1	1	0	1	1	0	1
ID365	1	1	1	1	1	1	1	0	1	1	0	0
ID366	1	1	1	1	1	1	1	1	1	1	0	1
ID367	1	0	1	1	1	1	1	1	1	1	0	1
ID368	1	0	1	1	1	1	1	1	1	1	0	0
ID369	1	1	1	1	1	1	1	0	1	1	0	1
ID370	1	1	1	1	1	1	0	0	1	1	0	0
ID371	1	0	1	1	1	1	1	1	0	1	0	0
ID372	1	0	0	1	1	1	1	0	0	1	0	1
ID373	1	1	0	1	1	0	1	0	1	0	0	1
ID374	1	1	1	1	1	1	1	1	1	1	0	1
ID375	0	1	1	1	1	1	0	0	0	1	1	0
ID376	1	0	1	1	1	1	1	0	1	1	0	1
ID377	1	1	1	1	0	1	1	0	1	1	0	1
ID378	1	1	1	1	1	1	1	0	1	1	1	0
ID379	0	1	1	1	1	1	1	0	1	1	1	1
ID380	1	1	1	1	1	1	1	0	1	1	0	1
ID381	1	1	1	1	1	1	1	0	1	1	0	1
ID382	1	1	1	1	1	1	1	1	1	1	0	1
ID383	0	0	1	1	1	0	1	0	1	1	1	1
ID384	1	1	1	1	1	1	1	1	1	1	0	0
ID385	0	1	1	1	1	1	0	0	1	0	0	0
ID386	0	1	1	1	1	1	1	0	1	1	0	0
ID387	0	0	1	0	0	0	1	0	0	0	0	0
ID388	1	0	1	1	0	1	1	0	1	1	0	1
ID389	1	1	1	1	1	1	1	0	1	1	0	0
ID390	0	1	0	1	1	0	1	0	1	0	0	0
ID391	0	1	1	0	0	0	0	0	0	0	0	0
ID392	1	1	1	1	1	1	1	0	1	1	0	0
ID393	0	1	1	0	1	1	0	0	0	1	0	0
ID394	1	1	1	1	1	1	1	0	0	1	1	1
ID395	1	1	1	1	0	0	1	0	1	1	0	0
ID396	1	0	1	0	1	1	0	0	1	0	0	0
ID397	1	1	1	1	1	1	1	0	1	1	1	0
ID398	1	0	1	1	1	1	1	1	1	1	0	0
ID399	0	1	1	0	1	1	0	0	1	1	1	0
ID400	1	1	1	1	1	1	1	1	1	1	0	1
ID401	0	0	1	1	0	0	0	0	1	1	0	0
ID402	1	1	1	1	1	1	1	1	1	1	0	1
ID403	0	0	1	1	1	1	1	0	1	0	0	1
ID404	1	1	1	1	1	1	1	1	1	0	0	1
ID405	1	0	0	1	1	0	0	0	0	0	0	0
ID406	0	0	1	1	1	0	1	1	1	1	0	1
ID407	1	1	1	1	1	1	1	0	1	1	0	1
ID408	1	0	1	1	1	0	1	0	1	1	0	0
ID409	1	0	1	1	0	0	1	0	1	1	0	0
ID410	1	1	1	1	1	1	1	0	1	1	0	0
ID411	0	1	1	1	1	1	0	0	0	1	0	1
ID412	1	1	1	1	1	0	0	0	0	1	0	0
ID413	1	0	0	0	1	0	1	0	0	1	0	0
ID414	1	1	1	1	1	1	1	1	1	1	1	1
ID415	1	1	1	1	1	1	1	1	1	1	1	1
ID416	1	1	1	1	1	1	1	1	1	0	0	1
ID417	0	1	1	1	1	1	0	0	1	0	0	1
ID418	1	0	1	0	1	0	0	0	0	0	0	0
ID419	1	1	1	1	1	1	1	0	1	1	0	1
ID420	1	1	0	1	1	0	1	0	0	1	0	1
ID421	1	1	1	1	1	1	1	1	1	1	0	1
ID422	0	0	1	0	1	1	1	1	1	1	0	0
ID423	0	0	1	1	1	0	1	0	0	1	0	0
ID424	1	1	1	1	1	1	1	0	1	1	1	1
ID425	1	1	1	1	1	1	1	0	1	1	0	1
ID426	1	0	1	1	0	1	1	0	0	0	1	0
ID427	1	1	1	1	1	1	1	1	1	0	0	0
ID428	1	0	1	1	1	0	1	0	1	1	0	1
ID429	1	1	1	1	1	1	1	0	1	1	0	1
ID430	1	1	1	1	1	1	1	1	1	1	1	1
ID431	0	1	1	1	0	1	1	0	1	0	0	1
ID432	0	0	1	1	1	1	1	0	0	1	0	0
ID433	0	0	1	1	0	0	1	0	1	0	0	1
ID434	1	1	1	1	1	1	1	1	1	1	0	1
ID435	1	0	1	1	1	1	1	1	1	1	0	1
ID436	1	0	1	1	0	1	1	1	1	1	0	1
ID437	0	1	1	1	0	1	1	0	0	1	0	1
ID438	0	0	1	0	1	0	0	0	1	0	0	0
ID439	1	1	0	1	1	0	1	0	0	1	0	1
ID440	0	1	1	1	1	1	0	1	1	1	0	1
ID441	1	1	1	1	1	1	1	1	1	1	0	0
ID442	0	1	1	1	1	1	1	0	1	1	0	1
ID443	1	0	1	1	1	1	0	0	1	1	0	0
ID444	1	0	1	1	1	1	1	1	1	1	0	1
ID445	1	1	1	1	1	1	1	1	1	1	0	0
ID446	1	1	1	1	1	1	1	1	1	1	0	1
ID447	1	1	1	1	1	1	1	1	1	1	1	1
ID448	1	1	1	1	1	1	1	1	1	1	1	1
ID449	1	1	1	1	1	1	1	1	1	1	1	1
ID450	1	1	1	0	0	1	1	0	1	1	0	1
ID451	1	1	1	1	1	1	1	1	1	1	0	1
ID452	1	1	1	1	1	1	1	0	1	1	1	1
ID453	1	1	1	1	1	1	1	1	1	1	1	1
ID454	1	0	1	1	1	1	1	1	1	1	0	1
ID455	1	1	1	1	1	1	1	0	1	1	1	1
ID456	1	1	1	1	1	1	1	1	1	1	1	0
ID457	1	1	1	1	1	0	0	0	1	0	0	1
ID458	1	1	1	1	0	0	1	0	0	1	0	0
ID459	0	1	1	1	1	1	0	0	1	1	0	1
ID460	1	1	1	1	1	1	1	1	1	1	0	1
ID461	1	1	1	1	1	1	1	1	1	1	0	1
ID462	1	1	1	1	1	1	1	1	1	1	1	0
ID463	1	0	1	0	1	1	1	1	1	1	0	1
ID464	1	1	1	1	1	1	1	1	1	1	0	0
ID465	1	1	1	0	1	1	1	1	1	1	1	0
ID466	1	1	1	1	1	1	1	1	1	1	0	0
ID467	1	1	1	1	1	1	1	0	1	1	0	1
ID468	0	1	1	0	0	1	1	0	1	1	0	1
ID469	1	1	1	0	1	1	1	0	1	1	0	1
ID470	1	1	1	1	1	1	0	1	1	1	0	1
ID471	0	0	1	1	1	1	1	0	0	1	0	0
ID472	1	1	1	1	1	1	0	0	1	0	0	0
ID473	1	1	1	1	1	0	1	0	1	1	0	1
ID474	1	0	1	1	1	1	1	0	0	1	0	0
ID475	0	1	1	0	1	0	1	0	1	1	0	1
ID476	1	1	1	1	1	1	1	0	1	1	1	1
ID477	1	1	1	1	1	1	1	1	1	1	0	1
ID478	1	1	1	1	1	1	1	0	1	1	1	0
ID479	1	1	1	1	1	1	1	1	1	1	0	1
ID480	0	0	1	0	0	0	0	0	1	0	0	0
ID481	1	1	1	1	1	1	1	0	1	1	0	1
ID482	0	1	1	1	1	1	1	0	1	1	0	1
ID483	0	1	1	0	1	1	1	0	1	1	0	1
ID484	0	1	0	1	1	0	1	1	0	1	0	1
ID485	1	0	1	0	0	0	0	0	0	1	0	1
ID486	1	1	1	1	1	1	1	1	1	1	0	1
ID487	1	1	1	1	1	1	1	1	1	1	0	1
ID488	1	1	1	1	1	1	1	0	1	1	0	0
ID489	1	1	1	1	1	1	1	1	1	1	1	1
ID490	1	1	1	1	1	1	1	0	1	1	0	1
ID491	1	1	1	1	1	1	1	0	1	1	0	1
ID492	1	1	1	1	1	1	1	1	1	1	1	1
ID493	1	1	1	1	1	1	1	1	1	1	0	1
ID494	1	1	1	1	0	1	1	0	1	1	0	1
ID495	1	1	1	1	1	1	1	1	1	1	0	0
ID496	1	0	1	1	1	1	1	1	1	1	0	0
ID497	1	1	1	1	1	1	1	1	1	1	0	1
ID498	1	1	1	1	1	1	1	1	1	1	0	1
ID499	0	0	1	0	1	1	0	1	1	1	0	0
ID500	0	0	1	0	1	0	1	0	0	1	0	0
ID501	1	1	1	1	1	1	1	1	1	1	0	1
ID502	1	1	1	1	1	1	1	1	1	1	0	1
ID503	1	1	1	1	1	1	1	1	1	1	0	1
ID504	0	1	0	1	1	1	1	1	1	1	0	0
ID505	1	1	1	1	1	1	1	0	1	1	0	1
ID506	0	0	1	1	1	0	1	0	1	1	0	1
ID507	0	1	0	0	1	0	0	0	0	0	0	1
ID508	0	1	1	1	1	0	1	0	1	1	0	0
ID509	1	1	1	1	1	1	1	1	1	1	0	1
ID510	0	0	1	1	0	1	1	0	1	0	0	0
ID511	1	1	1	1	1	1	1	1	1	1	0	1
ID512	0	1	1	1	1	1	0	0	1	0	0	1
ID513	0	1	1	1	0	0	1	0	1	1	0	0
ID514	0	1	1	1	0	0	1	0	0	0	0	0
ID515	1	1	1	1	1	1	1	0	1	1	1	1
ID516	1	1	1	1	1	1	1	1	1	1	0	1
ID517	1	1	1	1	1	1	1	1	1	1	1	1
ID518	1	1	1	1	1	1	1	1	1	1	0	1
ID519	1	1	1	1	1	1	1	0	1	0	0	1
ID520	1	1	1	1	1	1	1	1	1	1	0	1
ID521	1	1	1	1	1	1	1	1	1	1	1	1
ID522	1	0	0	1	1	1	1	0	1	0	1	1
ID523	1	1	1	1	1	1	1	0	1	1	0	1
ID524	0	1	1	1	1	1	1	1	1	1	0	1
ID525	0	0	1	1	0	1	1	0	0	0	0	0
ID526	1	1	1	1	1	0	1	1	1	1	0	1
ID527	0	0	1	1	1	0	1	0	1	1	0	0
ID528	1	1	1	1	1	1	1	1	1	0	0	1
ID529	1	1	1	1	1	1	1	0	1	1	1	1
ID530	1	1	1	1	1	1	1	1	1	1	0	1
ID531	1	1	1	1	1	1	0	1	1	1	0	0
ID532	1	0	1	1	1	1	1	0	1	1	0	0
ID533	1	0	1	1	1	1	1	1	1	1	0	1
ID534	1	1	0	1	1	1	1	1	1	1	0	0
ID535	1	1	1	1	1	1	1	1	1	1	1	1
ID536	0	1	1	1	1	1	1	0	0	0	1	1
ID537	0	0	1	1	1	1	1	0	0	1	0	1
ID538	1	0	1	1	1	1	1	0	1	1	0	1
ID539	1	1	1	1	1	1	1	0	1	1	0	1
ID540	0	0	1	0	1	1	1	0	1	1	0	1
ID541	0	0	1	1	1	1	1	0	1	1	0	1
ID542	1	0	1	1	1	0	1	0	1	1	0	0
ID543	1	1	1	1	1	1	1	0	0	0	0	0
ID544	0	1	1	1	1	0	1	0	1	1	0	1
ID545	1	0	1	1	1	0	1	0	1	1	0	0
ID546	0	1	0	1	1	1	1	1	1	1	0	0
ID547	1	1	1	1	1	1	1	1	1	1	0	1
ID548	1	0	1	0	1	1	1	1	1	1	0	1
ID549	1	0	1	1	1	1	1	0	1	1	0	1
ID550	1	1	1	1	1	1	1	0	1	1	1	1
ID551	1	1	0	0	1	1	0	0	1	1	0	1
ID552	1	1	1	1	1	1	1	0	1	1	1	1
ID553	1	1	1	1	1	1	0	0	1	1	0	1
ID554	1	1	1	1	1	1	1	0	1	1	0	1
ID555	1	1	1	1	1	1	1	1	1	1	0	1
ID556	1	1	1	1	1	1	1	1	1	1	0	1
ID557	1	0	1	1	1	1	1	1	1	1	0	1
ID558	1	1	1	1	1	0	0	1	1	1	1	1
ID559	1	1	1	1	1	1	1	1	1	1	0	1
ID560	1	1	1	1	1	1	1	0	1	1	0	1
ID561	1	1	1	1	1	1	1	1	1	1	0	1
ID562	1	1	1	1	1	1	1	1	0	1	0	1
ID563	1	1	1	1	1	1	1	1	1	1	1	0
ID564	1	1	1	1	1	1	1	0	1	1	0	1
ID565	1	1	1	1	1	1	1	0	1	1	0	1
ID566	1	1	0	1	1	1	1	1	1	1	0	1
ID567	1	1	1	1	1	1	1	1	1	1	1	1
ID568	1	1	1	1	1	1	1	0	1	1	1	1
ID569	0	0	1	0	1	0	1	0	0	1	0	0
ID570	0	0	1	1	0	1	0	0	0	0	0	0
ID571	1	1	1	1	1	1	1	1	1	1	0	1
ID572	1	1	1	1	1	1	1	1	1	1	0	1
ID573	1	1	1	1	1	1	1	0	1	1	1	1
ID574	0	1	1	1	1	0	1	0	1	0	0	0
ID575	1	1	1	1	1	1	1	1	1	1	0	1
ID576	1	0	1	1	1	1	1	1	1	1	1	1
ID577	1	1	1	1	1	1	1	0	1	1	0	1
ID578	1	1	0	1	1	1	1	1	1	1	0	1
ID579	1	1	1	1	1	1	1	0	1	1	0	1
ID580	1	0	1	1	1	1	1	0	1	1	0	1
ID581	1	0	1	1	1	1	0	0	0	1	0	0
ID582	0	0	0	1	1	0	0	0	0	1	0	0
ID583	1	0	1	1	1	0	0	0	1	0	0	0
ID584	0	0	1	0	1	0	1	0	0	1	0	0
ID585	1	1	1	1	1	1	1	1	1	1	0	1
ID586	1	1	1	1	1	1	0	0	1	1	0	1
ID587	1	1	0	1	1	0	1	0	1	1	0	0
ID588	1	0	1	1	1	0	1	0	0	0	0	0
ID589	1	0	1	1	1	1	1	0	1	1	0	1
ID590	0	0	0	1	0	1	0	0	1	1	0	0
ID591	1	1	1	1	1	1	1	1	1	1	0	1
ID592	1	0	1	0	0	0	0	0	0	0	0	0
ID593	1	1	1	1	1	1	1	0	1	1	0	0
ID594	1	1	0	1	0	0	1	0	1	1	0	1
ID595	1	1	1	1	1	1	1	1	0	1	0	0
ID596	1	1	1	1	1	0	1	0	1	1	0	1
ID597	0	1	1	1	1	0	1	0	0	1	0	1
ID598	0	0	1	1	1	0	1	0	0	0	0	1
ID599	0	1	1	1	1	0	1	0	1	1	0	0
ID600	1	0	1	1	1	1	1	0	1	0	0	0
ID601	1	1	1	1	1	1	1	1	1	0	0	0
ID602	1	1	1	1	1	1	1	1	0	1	0	0
ID603	0	0	1	1	1	1	1	0	0	1	0	0
ID604	1	1	1	1	1	1	1	1	1	1	0	1
ID605	0	0	1	1	0	1	1	0	0	0	0	0
ID606	0	0	1	0	0	0	0	0	0	0	0	0
ID607	0	0	1	1	1	0	0	0	1	1	0	0
ID608	0	0	1	0	1	1	1	0	1	1	0	0
ID609	1	1	1	1	1	1	1	0	1	1	0	1
ID610	1	1	1	1	1	1	1	0	1	1	0	1
ID611	1	0	1	1	0	0	0	0	1	0	0	1
ID612	1	1	1	1	1	0	1	0	0	1	0	0
ID613	0	1	0	1	1	0	0	0	0	1	0	1
ID614	0	0	0	0	0	0	0	0	0	0	0	0
ID615	0	0	1	0	1	0	0	0	0	1	0	0
ID616	1	0	1	0	0	1	0	0	0	0	0	0
ID617	0	1	1	1	1	0	1	0	1	0	0	0
ID618	0	0	0	0	0	0	0	0	1	0	0	0
ID619	1	1	1	1	1	1	1	0	1	1	0	1
ID620	0	0	0	1	0	0	0	0	0	0	0	0
ID621	1	1	1	1	0	0	1	0	0	1	0	1
ID622	0	0	1	0	0	0	0	0	0	0	0	0
ID623	0	0	0	0	0	0	0	0	0	0	0	1
ID624	1	1	1	1	1	1	1	1	1	1	1	1
ID625	1	1	1	1	1	1	1	1	1	1	0	1
ID626	1	1	1	1	1	1	1	0	1	1	1	1
ID627	1	1	0	0	1	1	1	1	1	1	0	1
ID628	1	1	1	1	1	1	1	1	1	1	0	0
ID629	0	1	1	1	1	0	1	0	1	1	0	0
ID630	1	1	1	1	1	1	1	1	1	1	1	1
ID631	1	1	1	1	1	1	1	1	1	0	0	1
ID632	1	1	1	1	1	1	1	1	1	1	0	1
ID633	1	1	1	1	1	1	0	1	1	1	0	1
ID634	1	1	1	1	1	0	1	1	1	1	0	1
ID635	1	0	1	0	1	0	1	0	1	1	0	1
ID636	1	1	1	1	1	0	1	0	0	1	0	0
ID637	0	0	1	0	0	1	0	0	0	0	0	0
ID638	0	1	1	1	1	1	1	1	1	0	0	1
ID639	0	0	1	0	1	0	1	0	1	0	0	0
ID640	1	0	1	1	0	0	1	0	1	0	0	1
ID641	1	0	1	1	1	1	1	0	1	1	0	1
ID642	1	1	0	0	0	0	1	0	0	1	0	0
ID643	0	1	1	1	1	1	1	0	1	1	0	1
ID644	1	1	1	1	1	1	0	1	1	1	0	1
ID645	1	1	1	1	1	1	0	0	1	1	0	1
ID646	0	0	1	1	1	0	0	0	1	0	0	1
ID647	0	1	1	1	1	1	1	1	1	1	0	1
ID648	1	1	1	1	1	1	0	1	1	1	0	1
ID649	0	1	1	1	1	0	0	0	0	0	0	0
ID650	1	1	1	1	1	1	1	1	1	1	0	1
ID651	1	1	1	1	1	1	1	0	1	1	0	1
ID652	0	1	1	1	1	1	1	1	1	0	0	1
ID653	1	0	0	1	0	1	0	0	0	0	0	0
ID654	1	0	1	1	1	0	1	0	1	0	0	0
ID655	1	1	1	0	1	0	0	0	1	1	0	0
ID656	1	1	1	1	1	0	0	0	1	0	0	0
ID657	1	1	1	0	1	1	1	0	1	0	0	1
ID658	1	1	1	1	1	1	0	1	1	1	0	1
ID659	0	0	1	0	0	0	0	0	0	0	0	1
ID660	0	1	0	0	0	0	1	0	0	0	0	0
ID661	1	1	1	1	1	1	1	0	1	1	1	1
ID662	0	0	1	1	1	0	1	0	1	1	0	0
ID663	1	0	1	1	0	0	1	1	1	1	0	1
ID664	0	1	1	1	1	0	1	1	0	1	0	1
ID665	1	0	1	1	1	1	1	0	0	1	0	0
ID666	0	0	0	0	0	0	0	0	0	0	0	0
ID667	1	0	1	1	0	1	1	0	1	1	0	0
ID668	1	0	1	1	1	1	1	0	1	0	0	1
ID669	1	1	1	1	0	0	0	1	1	1	0	1
ID670	1	1	1	1	1	1	1	0	0	1	0	1
ID671	1	1	1	0	0	1	0	1	1	1	0	1
ID672	0	0	0	0	0	0	0	0	1	0	0	0
ID673	0	1	1	1	1	1	1	0	1	1	0	1
ID674	0	0	1	1	1	1	0	0	0	0	0	0
ID675	1	1	1	1	1	1	1	1	1	1	0	1
ID676	1	1	1	1	0	1	1	1	1	1	0	1
ID677	1	1	1	1	1	1	1	0	1	1	1	1
ID678	0	1	1	1	0	1	1	0	1	1	0	0
ID679	1	1	1	1	1	1	1	1	1	1	1	1
ID680	0	0	1	1	0	0	0	0	0	0	0	0
ID681	1	1	1	0	1	1	1	1	1	1	1	0
ID682	0	1	1	1	1	1	1	1	1	1	0	1
ID683	0	1	1	1	1	1	1	0	1	1	1	1
ID684	0	1	1	1	1	0	0	0	0	1	0	0
ID685	0	1	1	1	1	1	1	1	1	1	0	1
ID686	1	1	1	1	1	1	1	1	1	1	0	1
ID687	1	1	1	1	1	1	1	1	1	1	0	1
ID688	0	0	1	1	0	1	1	0	1	0	0	0
ID689	1	1	1	0	1	1	1	0	1	0	0	0
ID690	0	0	1	1	1	0	0	0	1	0	0	0
ID691	0	0	1	0	1	0	1	0	1	0	0	0
ID692	0	0	0	0	1	1	0	0	0	0	0	0
ID693	0	0	1	1	1	0	1	0	0	0	0	0
ID694	0	0	1	1	0	0	0	0	0	1	0	0
ID695	1	1	1	1	0	1	0	0	1	1	1	1
ID696	0	0	1	1	1	1	1	1	1	1	0	1
ID697	0	1	1	1	1	1	0	0	1	1	0	1
ID698	1	1	1	1	1	1	1	0	1	1	0	1
ID699	1	1	1	1	1	1	1	1	1	1	1	1
ID700	1	1	1	1	1	1	1	1	1	1	0	1
ID701	1	1	1	1	1	1	1	1	1	1	0	1
ID702	1	0	0	1	1	0	1	1	0	1	0	1
ID703	1	1	1	1	1	1	1	0	1	1	1	1
ID704	1	1	1	1	1	1	1	1	1	0	0	0
ID705	1	1	1	1	1	1	1	0	1	1	0	1
ID706	1	1	1	1	1	1	1	1	1	1	1	1
ID707	1	1	1	1	1	1	1	1	1	1	0	1
ID708	1	1	1	1	1	1	1	0	1	1	0	1
ID709	1	1	1	1	1	1	1	1	1	1	0	1
ID710	1	1	1	1	1	0	1	1	1	1	0	1
ID711	0	0	1	1	0	1	1	0	0	1	0	0
ID712	1	1	1	1	1	1	0	0	1	1	0	1
ID713	1	1	1	1	1	1	0	1	1	1	0	1
ID714	0	1	1	1	1	0	1	0	1	1	0	0
ID715	1	1	1	1	1	0	1	0	1	1	0	0
ID716	1	1	1	1	1	1	1	0	1	1	0	1
ID717	0	1	1	1	1	0	1	0	0	0	0	0
ID718	1	1	1	1	1	1	0	1	1	1	0	1
ID719	1	1	1	1	1	1	1	1	1	1	0	1
ID720	0	0	1	1	1	0	0	0	1	1	0	1
ID721	1	1	1	1	1	1	1	0	1	1	0	1
ID722	0	1	1	1	1	1	1	1	1	1	0	1
ID723	0	1	0	1	1	0	1	0	1	1	0	0
ID724	1	1	1	1	1	1	1	1	1	1	1	1
ID725	1	1	1	1	1	1	1	1	1	1	0	0
ID726	1	1	1	1	1	1	1	0	1	0	0	1
ID727	1	1	1	1	1	1	1	1	1	1	0	0
ID728	1	1	1	1	1	1	1	0	1	1	1	1
ID729	0	1	1	1	1	1	1	1	1	1	0	1
ID730	1	1	1	1	1	1	1	1	1	1	1	1
ID731	1	0	1	1	1	1	1	0	1	1	0	1
ID732	0	1	1	1	1	1	1	1	1	1	0	1
ID733	1	1	1	1	1	1	1	0	1	1	0	1
ID734	1	1	1	1	1	1	1	0	1	1	1	1
ID735	1	1	1	1	1	1	1	1	1	1	0	0
ID736	0	0	1	1	0	1	1	1	0	0	0	0
ID737	1	1	1	1	0	1	1	0	1	1	0	1
ID738	1	0	1	1	1	1	1	1	1	1	0	1
ID739	1	1	1	1	1	1	1	1	1	1	0	0
ID740	0	1	1	1	1	1	1	1	1	0	0	1
ID741	1	1	1	1	1	1	1	1	0	1	0	1
ID742	0	1	1	0	0	1	1	0	1	1	0	0
ID743	1	0	1	1	1	0	1	0	1	1	0	1
ID744	0	1	1	1	1	1	1	0	0	1	1	0
ID745	0	1	1	1	1	1	0	0	0	1	0	1
ID746	1	0	1	1	1	1	1	0	1	1	0	0
ID747	0	1	1	0	1	1	0	0	1	1	0	1
ID748	1	1	1	1	1	1	1	1	1	1	0	1
ID749	1	1	1	1	1	0	1	1	1	1	0	0
ID750	0	0	1	0	1	0	0	0	1	0	0	0
ID751	1	0	1	1	1	1	1	0	1	1	0	1
ID752	0	1	1	1	1	1	1	1	1	1	0	0
ID753	0	0	1	1	1	0	0	0	0	1	0	1
ID754	0	1	1	1	1	1	1	1	1	1	0	0
ID755	0	0	1	1	0	1	0	1	1	1	0	0
ID756	1	1	1	1	1	1	1	0	1	1	0	1
ID757	1	1	1	1	0	1	1	0	0	0	0	1
ID758	0	0	1	1	0	0	1	0	0	0	0	0
ID759	1	0	1	1	0	0	1	0	0	0	0	0
ID760	1	1	1	1	1	1	1	0	1	1	0	1
ID761	1	1	1	0	1	1	1	0	1	1	0	1
ID762	1	1	1	1	1	1	1	1	1	1	0	1
ID763	1	1	1	1	1	1	1	1	1	1	1	1
ID764	0	0	1	1	1	1	1	1	1	1	1	1
ID765	1	1	1	1	1	1	1	1	1	1	1	1
ID766	0	1	1	1	1	0	1	0	1	1	0	0
ID767	1	1	1	1	1	0	1	0	1	1	0	0
ID768	1	0	1	1	1	1	1	1	0	1	0	1
ID769	1	0	1	1	1	0	0	0	1	0	0	1
ID770	1	1	1	1	1	1	1	0	1	1	0	1
ID771	1	1	1	1	1	1	1	1	1	0	1	1
ID772	0	1	1	1	1	1	0	0	1	0	0	0
ID773	1	1	1	1	1	1	0	1	1	1	0	1
ID774	1	1	1	1	1	1	1	0	1	1	1	1
ID775	0	0	1	0	1	1	0	0	0	1	0	0
ID776	1	0	1	1	1	1	1	0	1	1	0	1
ID777	1	1	1	1	1	1	1	1	1	1	0	1
ID778	1	0	1	1	1	1	1	0	1	1	0	1
ID779	1	1	1	1	1	0	1	1	1	1	0	1
ID780	0	1	1	1	1	1	1	0	0	1	0	1
ID781	1	1	1	1	1	1	1	0	0	1	0	1
ID782	1	1	1	1	1	1	1	1	1	1	0	1
ID783	1	0	1	1	1	0	0	0	0	1	0	0
ID784	0	0	1	1	0	1	0	0	1	1	0	0
ID785	0	1	1	0	1	1	1	0	1	1	0	1
ID786	1	1	1	1	1	1	1	0	1	1	0	1
ID787	1	0	1	1	1	0	1	0	1	0	0	0
ID788	0	1	1	1	1	1	1	0	1	1	0	1
ID789	0	0	0	0	1	0	0	0	1	1	0	0
ID790	0	0	1	1	0	0	0	0	0	1	0	0
ID791	0	1	1	1	1	1	1	1	1	1	0	1
ID792	0	1	1	1	1	1	1	0	1	1	0	1
ID793	0	1	1	1	1	1	1	1	0	1	0	1
ID794	1	1	1	1	0	1	1	1	1	1	0	1
ID795	1	1	1	1	1	1	1	0	1	1	0	0
ID796	0	1	1	1	1	1	0	0	1	1	0	1
ID797	0	1	1	1	1	1	1	1	1	1	0	0
ID798	0	1	1	1	1	1	1	0	1	1	0	1
ID799	0	1	1	1	1	1	1	1	1	1	0	1
ID800	1	1	1	1	1	1	1	0	1	1	0	1
ID801	0	1	1	0	0	1	1	0	1	1	0	1
ID802	1	0	1	1	1	1	1	1	0	1	0	0
ID803	0	1	1	0	1	0	1	0	0	1	0	0
ID804	1	1	1	1	1	1	1	0	1	1	0	0
ID805	1	1	1	1	1	1	1	0	1	1	0	1
ID806	1	1	1	1	1	1	1	1	1	1	0	1
ID807	0	0	1	1	1	0	1	0	1	1	0	1
ID808	1	1	1	1	1	1	1	0	1	1	0	1
ID809	0	1	1	1	1	0	1	0	1	1	0	1
ID810	0	0	1	1	0	0	1	0	1	0	0	0
ID811	0	0	1	0	1	0	1	0	0	0	0	0
ID812	0	1	1	1	0	1	1	0	1	1	0	1
ID813	1	1	1	0	0	0	1	0	1	1	0	1
ID814	1	1	0	1	0	0	1	0	1	1	0	1
ID815	0	1	1	1	1	0	1	0	1	1	0	0
ID816	1	1	1	1	1	1	1	1	1	1	1	1
ID817	1	0	1	1	1	1	1	1	1	1	1	1
ID818	1	1	1	1	1	1	1	0	1	1	1	1
ID819	0	0	0	1	0	1	1	1	0	1	0	0
ID820	0	1	1	1	1	1	1	0	1	0	0	0
ID821	0	1	1	1	1	1	1	0	0	0	0	1
ID822	1	1	1	1	1	0	1	1	1	1	0	1
ID823	0	0	1	1	1	0	0	0	1	0	0	0
ID824	0	1	1	1	1	1	1	0	1	1	0	1
ID825	0	1	1	1	1	1	1	1	1	0	0	0
ID826	0	0	1	1	1	0	1	0	0	0	0	0
ID827	0	1	1	1	1	0	1	0	1	0	0	0
ID828	0	0	1	0	1	0	0	0	0	0	0	0
ID829	1	1	1	1	1	1	1	1	1	1	1	1
ID830	0	0	1	1	0	0	1	0	0	1	0	0
ID831	1	1	1	1	1	1	1	0	1	1	0	1
ID832	1	1	1	1	1	1	1	0	1	1	0	1
ID833	1	1	1	1	1	1	1	0	1	1	0	1
ID834	0	0	1	1	1	1	0	0	1	1	0	0
ID835	1	1	1	1	1	1	1	0	1	1	0	1
ID836	1	1	1	1	1	1	1	1	1	1	1	1
ID837	1	1	1	1	1	0	1	0	1	1	0	1
ID838	0	1	1	1	1	1	1	1	1	1	0	0
ID839	1	1	1	1	1	1	1	0	1	0	0	0
ID840	1	1	1	1	1	1	1	1	1	1	0	1
ID841	1	1	1	1	1	1	0	1	1	1	0	1
ID842	0	0	1	1	1	0	0	0	1	0	0	0
ID843	0	1	1	1	1	0	1	0	0	0	0	1
ID844	0	0	1	1	1	1	1	0	1	1	0	0
ID845	1	0	1	1	1	0	0	0	1	1	0	0
ID846	0	0	1	1	1	0	0	0	1	1	0	0
ID847	0	0	1	1	1	0	1	0	1	1	0	1
ID848	0	1	1	1	1	0	1	1	1	1	0	1
ID849	0	0	1	1	1	0	1	0	0	0	0	0
ID850	0	0	1	1	1	0	1	0	0	0	0	0
ID851	1	0	1	0	1	0	1	0	1	1	0	0
ID852	1	0	1	1	1	1	1	0	1	1	0	1
ID853	1	1	1	1	1	1	1	0	0	1	0	1
ID854	0	1	1	1	0	0	1	0	0	1	0	0
ID855	0	0	1	0	1	0	0	0	1	0	0	0
ID856	1	0	1	1	1	1	1	1	1	1	0	1
ID857	0	1	1	1	0	1	1	0	0	0	1	0
ID858	0	1	1	1	1	1	1	1	1	1	0	1
ID859	1	1	1	1	1	1	1	0	1	1	0	1
ID860	1	1	1	1	1	1	1	1	1	1	0	1
ID861	0	0	1	0	1	1	1	0	1	1	0	0
ID862	1	0	1	1	1	1	0	0	0	0	0	0
ID863	1	1	1	1	1	0	1	0	1	1	0	1
ID864	1	1	1	1	1	1	1	1	1	1	0	1
ID865	0	1	1	1	1	1	1	0	1	1	0	1
ID866	0	1	1	1	1	0	1	0	1	1	0	1
ID867	0	0	0	1	1	0	0	0	0	1	0	0
ID868	1	1	1	1	1	1	0	0	1	1	0	1
ID869	0	1	1	1	1	0	1	0	1	1	0	1
ID870	1	0	1	1	1	1	1	1	1	1	0	0
ID871	1	1	1	1	1	1	0	0	1	1	0	0
ID872	1	1	1	1	1	1	1	0	1	1	0	0
ID873	1	0	1	1	1	0	1	0	1	0	0	0
ID874	1	0	1	0	1	1	1	0	1	1	0	1
ID875	0	1	1	1	1	1	1	0	1	1	0	0
ID876	1	1	1	0	1	1	1	0	1	1	0	0
ID877	1	1	1	1	0	0	0	1	1	1	0	0
ID878	1	0	1	0	1	1	1	0	1	1	0	1
ID879	1	1	1	1	1	0	1	0	0	0	0	1
ID880	1	1	1	1	1	0	1	0	0	0	0	0
ID881	0	0	1	0	1	0	0	0	0	0	0	0
ID882	0	0	1	0	1	0	0	0	1	1	0	1
ID883	0	0	1	1	1	1	1	0	0	1	0	0
ID884	0	0	1	1	1	0	1	0	0	0	0	0
ID885	1	1	1	1	1	1	1	0	1	1	0	0
ID886	1	1	1	1	1	0	0	0	1	1	0	0
ID887	0	0	1	1	1	0	1	0	0	1	0	0
ID888	0	1	1	1	0	0	1	0	1	1	0	0
ID889	1	1	1	1	0	1	1	1	1	1	0	1
ID890	0	0	0	0	1	0	0	0	0	1	0	0
ID891	0	0	1	1	0	0	1	0	0	0	0	1
ID892	0	1	1	1	1	1	1	1	1	1	0	1
ID893	1	1	1	1	1	1	1	0	1	1	0	1
ID894	0	1	1	1	1	0	1	0	1	1	0	0
ID895	1	0	1	1	1	1	0	0	1	0	0	1
ID896	0	1	1	1	1	0	1	0	0	0	0	0
ID897	1	1	1	1	1	1	0	0	1	1	0	1
ID898	1	1	1	1	1	0	0	0	0	1	0	0
ID899	0	0	0	1	0	0	0	0	0	1	0	0
ID900	0	1	0	1	1	1	0	0	1	1	0	1
ID901	1	1	1	0	1	1	0	1	1	1	0	1
ID902	0	0	1	0	1	0	0	0	1	0	0	0
ID903	0	0	1	0	0	1	0	0	0	0	0	0
ID904	0	0	1	0	1	0	0	0	0	0	0	1
ID905	0	0	1	1	1	1	1	0	1	1	0	0
ID906	1	0	1	0	1	1	0	1	1	1	0	0
ID907	0	1	1	1	1	1	1	0	1	1	0	1
ID908	0	0	1	1	1	1	1	0	1	1	0	1
ID909	0	1	1	1	1	1	1	1	1	1	0	1
ID910	1	1	0	1	1	0	1	0	0	1	0	1
ID911	0	1	1	1	1	1	1	1	1	1	0	1
ID912	1	1	1	1	1	1	1	1	1	1	0	0
ID913	1	1	1	1	1	1	1	1	1	0	1	0
ID914	1	1	1	1	1	1	1	0	1	1	1	1
ID915	1	1	1	1	1	0	1	0	1	1	1	1
ID916	1	0	0	0	1	0	0	0	0	1	0	1
ID917	0	0	1	1	1	0	1	0	1	1	0	0
ID918	0	0	0	1	0	0	1	0	0	0	0	0
ID919	1	1	1	1	1	1	1	1	1	1	0	0
ID920	0	1	1	1	1	1	1	1	1	1	1	0
ID921	1	0	1	1	1	0	1	0	0	1	0	0
ID922	1	1	1	1	1	1	1	0	1	1	0	1
ID923	0	0	1	1	1	0	1	0	1	1	0	0
ID924	1	0	0	0	1	0	1	0	1	0	0	1
ID925	0	0	1	0	1	1	1	1	1	1	1	0
ID926	0	1	1	0	1	0	1	0	0	1	0	0
ID927	0	0	1	0	1	0	1	0	1	0	0	0
ID928	0	0	1	1	1	0	1	0	1	0	0	0
ID929	0	1	1	0	1	0	0	0	1	0	0	0
ID930	0	1	1	1	1	0	1	1	0	1	0	1
ID931	0	0	1	1	1	1	0	0	0	1	0	1
ID932	1	1	1	1	1	1	1	0	1	0	0	1
ID933	1	1	1	0	1	1	1	0	0	1	0	1
ID934	0	1	1	1	1	0	1	0	1	0	1	1
ID935	1	0	1	1	1	1	0	1	0	1	0	1
ID936	1	0	1	1	1	1	1	0	1	1	0	1
ID937	0	0	1	1	1	0	1	0	1	0	0	0
ID938	0	1	1	1	0	1	1	0	1	1	0	1
ID939	0	0	0	1	0	0	0	0	1	1	0	1
ID940	1	1	1	1	1	1	1	1	0	1	0	1
ID941	1	1	1	1	0	1	1	1	1	1	0	0
ID942	0	0	1	1	1	1	1	0	1	0	0	1
ID943	0	1	1	1	1	1	1	1	1	1	0	1
ID944	1	1	1	1	1	1	1	1	1	1	1	1
ID945	1	1	1	1	1	1	1	0	1	1	0	1
ID946	0	0	1	0	1	0	1	0	0	0	0	0
ID947	1	0	1	1	0	1	1	0	1	1	1	1
ID948	0	1	1	1	1	1	1	1	1	1	0	1
ID949	0	0	0	0	1	1	1	0	1	1	0	1
ID950	1	1	1	1	1	1	1	0	1	1	0	1
ID951	1	1	1	0	1	1	1	1	1	1	0	0
ID952	1	1	1	1	1	1	1	1	1	1	0	1
ID953	1	1	1	1	1	1	1	0	1	1	1	1
ID954	1	1	1	0	1	1	1	0	1	1	0	0
ID955	1	1	1	1	1	1	1	1	1	1	0	0
ID956	0	1	1	1	1	1	1	1	1	1	1	1
ID957	1	1	1	0	1	1	1	1	1	1	0	1
ID958	0	1	1	0	0	1	0	0	0	1	0	0
ID959	1	1	1	1	1	1	1	1	1	1	0	0
ID960	1	1	1	1	1	1	1	0	1	1	0	1
ID961	1	0	1	1	1	1	1	1	1	1	0	0
ID962	1	1	1	1	1	1	0	0	0	1	0	1
ID963	1	1	1	1	1	1	1	1	1	1	0	0
ID964	0	0	1	1	1	0	1	0	1	1	0	1
ID965	0	1	1	1	1	1	1	0	1	1	0	1
ID966	1	1	1	1	1	1	1	1	1	1	0	0
ID967	1	1	1	1	1	1	1	1	1	1	1	1
ID968	1	1	1	1	1	1	1	1	1	1	0	0
ID969	1	1	1	1	1	1	1	1	1	0	0	1
ID970	1	1	0	1	1	1	1	1	1	1	0	1
ID971	1	1	1	1	1	0	1	0	0	1	0	0
ID972	0	1	1	1	1	1	0	0	0	1	0	1
ID973	1	0	1	0	1	0	1	0	0	1	0	0
ID974	1	1	1	1	1	1	0	1	1	1	0	1
ID975	1	1	1	1	1	0	1	0	1	1	0	0
ID976	1	1	1	1	1	1	1	1	1	1	1	1
ID977	0	1	1	1	1	1	1	1	1	1	1	1
ID978	1	1	1	1	0	1	1	1	1	1	1	1
ID979	1	1	1	1	1	1	1	1	1	1	1	1
ID980	1	1	1	1	1	1	1	0	1	1	0	1
ID981	1	1	1	1	1	1	1	1	1	1	0	1
ID982	1	1	1	1	1	1	0	0	1	1	0	1
ID983	1	1	1	1	1	1	1	0	1	1	1	1
ID984	0	0	1	0	1	0	0	0	1	0	0	0
ID985	1	1	0	0	0	0	0	1	1	1	0	1
ID986	0	1	1	1	1	1	1	1	1	1	1	1
ID987	0	1	1	1	1	1	1	0	1	1	0	1
ID988	1	1	1	1	1	1	1	0	1	0	0	0
ID989	0	1	1	1	1	1	1	1	1	1	0	1
ID990	0	0	1	1	1	1	1	0	1	1	0	1
ID991	1	1	0	1	1	1	1	1	1	1	0	1
ID992	0	0	1	1	1	1	1	0	1	0	0	1
ID993	0	1	1	0	1	1	1	1	0	0	0	1
ID994	1	1	1	1	1	1	0	1	1	1	0	0
ID995	1	1	1	0	1	1	1	1	1	1	0	1
ID996	1	0	1	1	1	1	1	1	1	0	0	1
ID997	1	1	1	1	0	1	1	0	1	1	0	0
ID998	0	0	1	0	0	0	0	0	1	0	0	0
ID999	0	0	1	1	1	0	0	0	1	0	0	0
ID1000	0	0	1	1	0	1	1	0	1	0	0	0
ID1001	1	1	1	1	1	1	1	0	1	1	0	1
ID1002	1	1	1	1	1	1	0	1	1	1	0	1
ID1003	1	0	1	1	1	1	1	0	1	1	0	1
ID1004	0	0	0	1	1	1	1	0	1	0	0	1
ID1005	1	1	1	0	1	1	1	0	1	1	1	1
ID1006	0	1	0	1	1	1	1	1	1	1	0	1
ID1007	1	0	1	1	1	0	1	0	0	0	0	1
ID1008	1	1	1	1	1	1	1	1	1	1	1	1
ID1009	1	1	1	1	1	1	1	0	1	1	0	1
ID1010	1	1	0	1	1	0	1	0	1	0	1	1
ID1011	0	0	1	1	1	1	1	0	1	1	0	1
ID1012	0	1	1	1	1	0	1	0	0	1	0	1
ID1013	1	0	1	1	1	1	1	1	1	1	0	1
ID1014	0	1	1	1	1	1	1	0	1	1	0	1
ID1015	0	0	1	1	1	1	1	0	0	1	0	0
ID1016	1	1	1	1	1	0	1	1	1	1	1	1
ID1017	1	1	1	1	1	1	1	1	1	1	0	1
ID1018	0	0	0	1	1	0	0	0	1	0	0	0
ID1019	1	1	1	1	1	1	1	0	1	1	0	1
ID1020	1	1	1	1	1	1	1	1	0	1	0	1
ID1021	1	0	1	1	1	0	0	0	0	1	0	1
ID1022	1	0	1	1	1	1	1	1	1	1	0	1
ID1023	0	1	1	1	1	0	1	0	0	1	0	0
ID1024	0	1	1	1	1	0	1	0	1	1	0	1
ID1025	0	0	1	1	1	0	0	0	0	1	0	0
ID1026	1	1	1	1	1	1	1	0	1	1	0	1
ID1027	0	1	1	1	1	1	1	0	1	1	0	0
ID1028	1	0	1	1	1	0	1	0	0	0	0	1
ID1029	1	1	1	1	1	1	1	0	1	1	0	0
ID1030	1	1	1	0	1	1	0	1	1	1	0	1
ID1031	0	1	1	1	1	1	0	0	1	1	1	1
ID1032	0	0	1	1	1	0	0	0	0	1	0	1
ID1033	0	1	1	1	1	0	0	0	1	0	0	1
ID1034	1	0	1	1	1	1	0	0	0	1	0	0
ID1035	1	1	1	1	1	1	0	1	0	1	0	0
ID1036	1	1	1	1	1	1	0	1	1	1	0	0
ID1037	0	1	1	1	1	0	0	0	1	1	0	0
ID1038	1	0	1	1	1	1	1	0	1	1	0	0
ID1039	1	1	1	1	1	1	0	0	1	1	0	1
ID1040	1	1	1	1	1	1	1	1	1	1	0	1
ID1041	0	0	0	1	1	0	0	0	0	1	0	0
ID1042	0	1	1	1	1	0	1	0	0	1	0	0
ID1043	1	0	1	1	1	1	1	1	1	1	0	1
ID1044	0	0	1	1	1	1	0	0	0	1	0	0
ID1045	1	1	1	1	1	0	0	0	1	1	0	0
ID1046	0	0	1	1	0	1	0	0	1	0	0	1
ID1047	0	0	0	0	1	0	0	0	0	0	0	0
ID1048	0	0	1	1	0	1	0	0	1	0	0	0
ID1049	0	0	1	1	1	0	1	0	0	0	0	0
ID1050	0	0	0	1	0	0	0	0	0	0	0	0
ID1051	1	1	1	0	0	0	1	0	0	1	0	1
ID1052	0	0	1	0	0	0	0	0	0	0	0	0
ID1053	0	0	1	1	0	0	1	0	1	0	0	0
ID1054	0	1	0	1	1	1	1	0	0	0	0	0
ID1055	0	1	1	1	1	0	1	0	1	1	0	0
ID1056	0	0	1	0	1	0	0	0	1	1	0	1
ID1057	1	1	1	1	1	1	1	1	1	1	0	1
ID1058	0	1	1	1	1	1	1	0	1	1	0	0
ID1059	0	0	1	0	0	0	1	0	1	0	0	0
ID1060	0	0	0	1	1	0	1	0	1	1	0	1
ID1061	0	1	1	1	0	1	1	0	1	1	0	1
ID1062	1	1	1	1	1	1	1	1	1	1	0	1
ID1063	1	1	1	1	1	1	1	1	1	1	0	0
ID1064	0	1	1	1	1	0	1	0	1	1	0	0
ID1065	1	1	1	1	1	1	1	1	1	1	1	0
ID1066	1	1	1	1	1	1	1	0	1	1	0	1
ID1067	1	1	1	1	1	1	1	0	1	1	0	0
ID1068	1	1	1	1	1	1	1	0	1	1	0	1
ID1069	0	1	1	1	0	0	1	0	0	0	0	0
ID1070	1	1	1	1	1	1	1	1	1	1	0	0
ID1071	0	0	1	1	1	0	1	0	0	0	0	0
ID1072	0	1	1	1	0	1	1	0	1	1	0	1
ID1073	1	1	1	1	1	1	0	0	1	1	0	0
ID1074	0	1	1	1	1	1	1	0	1	1	0	0
ID1075	1	0	1	0	1	0	1	0	0	0	0	0
ID1076	0	0	1	0	0	0	0	0	0	0	0	0
ID1077	0	1	1	1	1	0	1	0	1	1	1	1
ID1078	1	1	1	1	1	0	1	0	1	1	0	1
ID1079	1	0	1	1	1	1	1	1	1	1	1	1
ID1080	1	1	1	1	1	1	0	0	1	1	0	1
ID1081	1	0	0	1	1	1	1	0	1	0	0	0
ID1082	1	1	1	1	1	1	1	1	1	1	0	1
ID1083	0	1	1	1	1	1	1	1	1	1	0	1
ID1084	0	1	0	1	1	1	1	0	1	1	0	1
ID1085	1	1	1	1	1	1	1	1	1	1	0	1
ID1086	0	0	1	0	0	0	0	0	0	0	0	0
ID1087	0	0	1	1	1	1	1	0	1	1	0	1
ID1088	1	0	1	0	1	1	1	0	1	0	0	1
ID1089	0	0	1	1	1	0	1	0	1	0	0	0
ID1090	1	1	1	1	1	1	1	1	1	1	0	1
ID1091	1	0	1	1	1	1	0	0	1	0	0	1
ID1092	0	0	1	0	1	0	0	0	0	0	0	0
ID1093	1	1	1	1	1	1	1	0	1	1	0	1
ID1094	0	0	1	1	0	0	1	0	0	0	0	0
ID1095	0	1	1	1	1	1	1	0	1	1	0	1
ID1096	1	1	1	1	1	1	1	1	1	1	0	1
ID1097	1	1	1	1	1	1	1	1	1	1	0	1
ID1098	1	1	1	1	1	1	1	1	1	1	0	1
ID1099	1	1	1	1	1	1	1	0	1	1	0	1
ID1100	1	1	1	1	1	1	1	1	1	0	0	1
ID1101	0	1	1	1	1	1	1	1	1	1	0	1
ID1102	1	1	1	1	1	1	1	1	1	1	0	1
ID1103	1	1	1	1	1	1	1	1	1	1	0	1
ID1104	0	1	1	0	1	0	0	0	1	1	0	1
ID1105	1	0	1	0	1	1	1	0	0	0	1	0
ID1106	1	1	1	1	1	1	0	1	1	1	0	0
ID1107	1	1	1	1	1	1	1	0	1	1	1	0
ID1108	0	0	1	1	1	0	1	0	0	1	0	0
ID1109	1	1	1	1	1	0	1	1	1	1	0	0
ID1110	1	1	1	1	1	1	0	0	1	0	0	1
ID1111	1	0	1	1	1	1	1	0	1	1	0	1
ID1112	1	1	1	1	0	0	0	0	1	1	0	1
ID1113	0	1	1	1	1	1	1	1	0	1	0	0
ID1114	0	0	1	1	0	0	1	0	1	1	0	0
ID1115	1	0	1	1	1	1	1	1	1	1	0	1
ID1116	1	1	1	1	1	1	1	1	0	1	0	0
ID1117	1	1	1	1	1	1	1	1	1	1	0	1
ID1118	1	1	1	1	1	1	0	0	1	1	0	1
ID1119	1	1	1	1	1	1	1	1	1	1	0	0
ID1120	0	1	1	1	1	1	1	1	1	1	0	1
ID1121	1	1	1	1	0	1	1	1	1	1	0	0
ID1122	1	1	1	1	1	1	1	1	1	1	0	1
ID1123	1	1	0	1	1	1	1	1	1	1	0	1
ID1124	1	1	1	1	1	1	1	1	1	1	0	1
ID1125	1	1	1	1	1	1	1	1	1	1	1	1
ID1126	1	1	1	1	1	1	1	1	1	1	1	1
ID1127	1	1	1	1	1	1	1	1	1	0	0	0
ID1128	1	1	1	1	1	1	1	1	1	1	0	1
ID1129	1	1	1	1	1	1	1	1	1	1	0	1
ID1130	1	0	1	1	1	1	1	1	1	1	1	1
ID1131	1	1	1	1	1	1	0	0	1	1	1	1
ID1132	1	1	1	1	1	1	1	1	1	1	0	0
ID1133	1	1	1	1	1	1	1	1	1	1	0	1
ID1134	1	1	1	1	1	1	1	0	1	1	0	1
ID1135	1	1	1	1	1	1	1	1	1	1	0	1
ID1136	1	1	1	0	1	0	1	0	1	1	0	1
ID1137	0	0	0	0	1	1	0	0	1	0	0	0
ID1138	0	0	0	0	1	1	1	0	0	0	0	0
ID1139	0	0	1	0	0	0	0	0	1	0	0	1
ID1140	0	1	1	0	1	0	1	0	1	1	0	0
ID1141	0	0	1	1	0	0	1	0	1	0	0	0
ID1142	0	1	1	1	1	1	0	0	1	1	0	0
ID1143	0	0	1	1	1	0	1	0	0	0	0	0
ID1144	0	0	1	1	1	0	1	0	1	0	0	0
ID1145	1	1	1	1	1	1	1	0	1	0	0	1
ID1146	0	1	1	1	1	1	1	0	1	0	0	1
ID1147	1	1	1	1	1	0	1	0	1	1	0	1
ID1148	1	1	1	1	1	0	1	0	1	0	0	1
ID1149	1	1	1	1	1	1	0	1	1	1	0	0
ID1150	1	1	1	1	1	1	1	1	1	1	0	1
ID1151	1	0	1	1	1	0	1	0	1	1	0	1
ID1152	1	0	1	1	1	0	1	1	1	1	0	0
ID1153	0	0	0	0	1	0	0	0	0	0	0	0
ID1154	0	0	1	0	1	0	1	0	0	0	0	0
ID1155	1	0	1	1	1	0	0	0	0	0	0	0
ID1156	1	0	1	1	0	0	0	0	1	0	0	1
ID1157	1	1	1	1	1	1	1	0	1	0	0	0
ID1158	1	1	1	1	1	1	1	1	1	1	0	1
ID1159	1	0	1	1	1	1	1	1	1	1	0	1
ID1160	1	0	1	1	1	1	1	1	1	1	0	1
ID1161	1	1	1	1	1	1	1	1	1	1	0	1
ID1162	1	1	1	1	1	1	1	1	1	1	0	1
ID1163	1	1	1	1	1	1	1	1	1	1	0	0
ID1164	1	0	1	1	1	0	1	0	0	1	0	1
ID1165	1	1	1	1	1	1	1	0	1	1	1	0
ID1166	1	1	1	1	1	1	1	1	1	1	1	1
ID1167	0	1	1	0	0	0	0	0	1	1	0	0
ID1168	1	1	1	1	1	1	1	1	1	1	0	0
ID1169	0	0	1	1	0	0	0	0	0	0	0	0
ID1170	1	0	1	1	1	0	0	0	1	1	0	1
ID1171	0	1	0	1	0	1	1	1	1	1	0	1
ID1172	1	1	1	1	1	1	0	0	1	1	0	0
ID1173	0	0	1	1	0	0	0	0	1	0	0	1
ID1174	1	1	1	1	1	1	1	0	1	1	1	1
ID1175	1	1	1	1	1	1	1	0	1	1	1	1
ID1176	0	0	1	0	1	0	0	0	1	1	0	0
ID1177	1	1	1	1	1	1	1	1	1	1	0	1
ID1178	1	0	1	0	1	1	1	1	1	1	0	1
ID1179	1	1	0	1	1	1	1	1	1	1	0	0
ID1180	0	0	1	0	1	1	1	0	1	0	0	0
ID1181	0	1	1	1	1	0	1	0	1	1	0	1
ID1182	1	1	1	1	1	1	1	0	1	1	0	0
ID1183	1	0	1	1	1	1	1	0	1	1	1	0
ID1184	1	1	1	1	1	1	1	1	1	1	0	1
ID1185	1	1	1	1	1	1	1	1	1	1	0	1
ID1186	1	1	1	1	1	1	1	1	1	1	0	1
ID1187	1	1	1	1	1	1	0	0	1	1	0	1
ID1188	0	0	1	1	1	0	1	0	0	0	0	0
ID1189	1	1	1	1	1	0	1	1	0	1	0	1
ID1190	1	1	1	1	1	1	1	0	1	1	0	1
ID1191	0	1	1	1	1	1	1	0	1	1	0	1
ID1192	1	1	1	1	1	1	1	1	1	1	0	0
ID1193	1	1	1	1	1	1	1	0	1	1	0	0
ID1194	0	0	1	0	0	1	1	0	0	0	0	0
ID1195	0	0	0	0	0	0	0	0	0	0	0	0
ID1196	1	0	1	1	1	1	1	0	1	1	0	0
ID1197	0	0	1	1	0	1	0	0	1	1	0	0
ID1198	0	0	1	0	1	1	1	0	0	0	0	0
ID1199	1	0	1	1	0	0	1	0	0	1	0	0
ID1200	0	0	1	1	0	0	1	0	0	1	0	0
ID1201	1	1	1	1	0	1	1	0	1	1	0	1
ID1202	1	1	1	1	1	1	1	0	1	1	0	1
ID1203	0	0	1	0	1	1	0	0	0	0	0	0
ID1204	1	0	0	1	1	1	1	1	0	1	0	1
ID1205	0	0	1	1	1	0	0	0	0	0	0	0
ID1206	1	1	1	1	1	1	1	0	1	1	0	1
ID1207	1	1	1	1	1	1	1	0	1	0	0	1
ID1208	1	0	1	1	1	1	0	1	1	1	0	1
ID1209	0	0	1	1	1	1	0	0	1	1	0	0
ID1210	1	0	1	1	1	0	0	0	1	1	0	1
ID1211	0	0	1	1	0	0	0	0	0	0	0	0
ID1212	1	1	1	1	0	1	1	0	1	1	0	1
ID1213	0	0	1	0	1	0	1	0	0	0	0	0
ID1214	1	1	1	1	1	1	1	1	1	1	1	1
ID1215	1	1	1	0	1	1	1	1	1	1	1	0
ID1216	1	1	1	1	1	0	0	1	1	1	0	1
ID1217	1	1	1	0	0	0	1	1	1	1	0	0
ID1218	0	0	1	0	1	1	0	0	0	1	0	0
ID1219	1	1	1	1	1	1	1	0	1	0	0	0
ID1220	1	0	1	1	1	1	1	0	0	1	0	1
ID1221	1	0	1	1	1	1	1	0	0	1	0	1
ID1222	0	0	1	1	1	1	1	0	1	1	0	1
ID1223	1	0	1	1	1	1	1	1	1	1	0	1
ID1224	1	1	1	1	1	1	1	0	1	1	0	1
ID1225	0	1	1	1	1	1	0	0	1	0	0	0
ID1226	1	1	1	1	1	1	1	0	1	1	0	1
ID1227	1	1	1	1	1	1	1	0	1	1	0	1
ID1228	1	1	1	1	1	1	1	1	1	1	0	1
ID1229	1	1	1	1	1	1	1	1	1	1	0	1
ID1230	0	0	1	1	1	0	1	0	1	1	0	0
ID1231	0	0	1	0	1	0	0	0	0	0	0	0
ID1232	0	1	1	1	1	1	1	0	1	1	0	1
ID1233	1	1	1	1	0	1	1	1	1	1	0	1
ID1234	1	1	1	1	1	1	1	1	1	1	0	1
ID1235	1	0	1	1	1	1	0	0	1	0	0	1
ID1236	1	1	1	1	1	1	1	1	1	1	1	0
ID1237	1	1	1	1	1	1	1	1	1	1	0	1
ID1238	0	1	1	1	1	0	1	1	1	1	0	1
ID1239	1	1	1	1	1	0	0	0	1	0	0	0
ID1240	0	1	1	1	1	1	1	0	1	1	0	1
ID1241	1	1	1	1	1	1	1	1	1	1	0	0
ID1242	1	1	1	1	1	1	1	1	1	1	0	1
ID1243	0	1	1	1	1	1	1	0	1	1	0	1
ID1244	1	1	1	1	1	1	1	0	1	1	1	0
ID1245	1	1	1	1	1	1	1	1	1	0	0	0
ID1246	0	1	1	1	1	1	1	0	1	0	0	0
ID1247	0	0	1	1	0	0	1	0	1	0	0	0
ID1248	0	0	1	1	0	0	0	0	0	1	0	1
ID1249	1	1	1	1	1	1	1	1	1	1	0	1
ID1250	1	1	1	0	0	0	1	0	1	1	0	0
ID1251	1	1	1	1	1	1	1	0	1	1	0	1
ID1252	1	1	1	1	1	1	1	1	1	1	0	1
ID1253	1	1	1	1	1	1	1	0	1	1	0	1
ID1254	0	0	1	1	0	1	1	0	1	0	0	0
ID1255	1	1	1	0	1	1	1	0	1	1	0	1
ID1256	1	1	1	1	1	1	1	1	1	1	0	1
ID1257	0	1	1	1	1	1	1	1	1	1	0	0
ID1258	1	1	1	1	1	1	1	1	1	0	0	0
ID1259	1	1	1	1	1	1	1	1	1	1	1	1
ID1260	1	1	1	1	1	1	1	1	1	1	0	1
ID1261	1	1	1	1	1	1	1	1	1	1	0	1
ID1262	1	1	1	1	1	1	1	1	1	1	1	1
ID1263	0	1	1	1	1	1	1	0	1	1	0	1
ID1264	1	0	1	1	1	1	1	1	1	1	0	1
ID1265	0	1	1	1	1	1	1	1	1	1	1	1
ID1266	0	1	0	1	1	1	1	0	1	0	0	0
ID1267	1	0	1	1	1	1	1	1	0	0	0	1
ID1268	0	1	1	1	1	1	1	0	1	0	0	0
ID1269	0	0	0	1	0	1	0	0	0	0	0	0
ID1270	1	1	1	1	1	1	1	1	1	0	0	1
ID1271	1	0	0	1	1	1	0	0	0	0	0	1
ID1272	0	0	1	1	1	0	1	0	0	0	0	1
ID1273	1	0	1	1	1	1	0	1	1	0	0	0
ID1274	0	0	1	1	1	1	1	0	1	0	0	1
ID1275	1	0	1	1	1	1	1	0	1	1	0	1
ID1276	0	0	1	0	1	0	1	0	1	1	0	1
ID1277	0	0	1	1	0	0	0	0	0	0	0	0
ID1278	0	1	1	1	0	1	1	0	0	0	0	0
ID1279	0	1	0	0	0	1	1	1	0	1	0	1
ID1280	0	1	1	1	1	1	0	0	1	1	0	0
ID1281	1	1	1	1	1	1	1	0	1	1	0	1
ID1282	1	0	1	1	0	1	0	0	0	0	0	0
ID1283	0	0	0	0	1	0	1	0	1	1	0	0
ID1284	1	0	1	1	1	1	1	0	1	1	0	1
ID1285	1	0	0	0	0	0	1	1	1	1	1	1
ID1286	0	1	1	1	1	1	1	0	0	1	0	1
ID1287	1	1	1	1	1	1	1	0	1	1	0	1
ID1288	0	1	1	1	1	1	1	0	1	0	1	1
ID1289	0	1	0	0	0	1	1	0	0	1	0	0
ID1290	0	0	0	0	0	0	0	0	0	1	0	0
ID1291	1	0	1	1	1	1	1	0	1	1	1	1
ID1292	1	0	1	1	1	0	1	0	1	1	0	1
ID1293	0	0	1	0	0	1	0	0	0	0	0	0
ID1294	1	0	1	1	0	1	0	0	0	1	0	1
ID1295	1	1	1	1	0	1	1	0	1	1	0	0
ID1296	0	0	1	0	1	0	0	0	0	0	0	0
ID1297	0	0	1	0	0	1	0	0	0	0	0	0
ID1298	0	0	1	1	0	0	0	0	0	0	0	0
ID1299	0	0	1	0	1	0	1	0	0	1	0	0
ID1300	1	0	1	0	1	0	1	0	0	1	0	0
ID1301	1	0	0	0	0	1	0	1	1	0	0	0
ID1302	1	1	1	1	1	1	1	1	1	1	1	1
ID1303	0	0	1	1	1	0	0	0	1	1	0	0
ID1304	0	0	1	1	1	1	0	0	1	1	0	0
ID1305	1	1	1	1	1	0	1	1	1	1	1	1
ID1306	1	1	1	1	1	1	1	1	1	1	0	1
ID1307	1	1	1	1	1	1	1	1	1	1	0	1
ID1308	1	1	1	1	1	1	1	0	1	1	0	0
ID1309	0	1	1	1	1	1	1	1	1	0	0	1
ID1310	1	0	1	1	1	0	0	0	1	0	0	1
ID1311	1	0	1	0	1	0	1	0	0	1	0	1
ID1312	0	0	1	1	1	0	0	0	0	0	0	0
ID1313	1	1	1	1	1	1	1	1	1	1	0	1
ID1314	0	0	1	1	1	1	0	1	1	1	0	1
ID1315	1	1	1	1	1	1	1	0	1	1	0	1
ID1316	1	1	1	1	1	0	1	0	1	1	0	1
ID1317	1	1	1	1	1	1	1	0	1	1	1	1
ID1318	1	1	1	1	1	1	1	1	1	1	0	1
ID1319	1	1	1	1	1	1	1	1	1	1	1	1
ID1320	0	1	1	1	1	0	1	0	1	1	0	1
ID1321	1	1	1	1	1	0	1	0	0	1	0	1
ID1322	0	1	0	1	1	1	1	0	0	1	0	0
ID1323	1	0	1	1	1	0	1	1	1	1	0	0
ID1324	1	1	1	1	1	1	1	0	1	1	0	1
ID1325	1	1	1	0	1	1	1	0	1	1	0	1
ID1326	0	0	1	1	1	1	1	1	0	1	0	1
ID1327	1	1	1	1	1	1	1	0	1	1	0	1
ID1328	0	1	1	1	0	1	1	1	0	0	0	1
ID1329	1	0	1	1	0	0	1	0	1	0	1	0
ID1330	1	1	1	1	1	1	1	0	1	1	0	1
ID1331	1	1	1	1	1	1	1	1	1	1	0	1
ID1332	1	1	1	1	1	1	1	1	1	1	0	1
ID1333	1	1	1	1	1	1	1	1	1	1	0	0
ID1334	0	0	1	1	1	1	1	1	1	0	0	1
ID1335	0	0	1	0	0	0	0	0	0	0	0	0
ID1336	1	1	1	1	1	1	1	1	1	1	0	1
ID1337	1	1	1	1	1	0	1	0	1	1	0	1
ID1338	0	0	1	1	1	1	0	0	0	0	0	0
ID1339	0	0	0	0	0	0	0	0	0	0	0	0
ID1340	1	1	1	1	1	1	0	0	1	1	0	1
ID1341	0	1	1	1	0	1	0	0	0	0	0	0
ID1342	1	1	1	1	0	1	1	1	1	1	0	1
ID1343	0	1	1	1	1	1	1	0	1	1	0	0
ID1344	0	1	1	1	1	0	0	1	0	1	0	0
ID1345	0	0	1	1	1	1	1	0	1	0	0	0
ID1346	0	0	1	1	0	0	0	0	1	0	0	0
ID1347	0	1	1	1	1	1	1	1	1	1	0	0
ID1348	0	1	1	1	1	1	1	1	1	1	1	1
ID1349	1	0	1	1	0	1	1	0	1	1	0	1
ID1350	1	1	1	1	1	1	1	1	1	1	0	1
ID1351	1	1	1	1	1	1	1	0	1	1	0	0
ID1352	1	1	1	1	1	1	1	1	1	1	1	0
ID1353	1	1	1	1	1	1	1	1	1	1	1	1
ID1354	1	1	1	1	1	1	1	0	1	0	0	1
ID1355	1	1	1	1	1	1	1	1	1	1	0	1
ID1356	0	1	1	1	1	0	1	0	0	1	0	0
ID1357	0	1	1	0	1	0	1	0	1	0	0	0
ID1358	1	1	1	1	1	1	1	1	1	1	0	1
ID1359	1	1	1	1	1	1	1	0	1	1	0	0
ID1360	1	1	1	1	1	1	1	1	1	1	0	1
ID1361	0	1	1	1	1	1	1	1	1	0	0	1
ID1362	0	0	1	0	1	0	1	0	1	1	0	0
ID1363	0	1	1	1	1	0	1	0	0	1	0	1
ID1364	0	0	1	1	0	1	1	0	0	0	0	0
ID1365	0	0	1	0	1	0	1	0	1	0	0	0
ID1366	1	1	1	1	0	1	1	1	1	1	0	0
ID1367	0	0	1	1	1	1	0	0	0	0	0	1
ID1368	1	1	1	1	1	1	1	0	1	1	0	1
ID1369	1	1	0	1	1	1	1	1	1	1	0	0
ID1370	1	1	1	1	1	0	0	0	1	1	0	0
ID1371	1	1	1	1	1	1	0	1	1	1	0	1
ID1372	1	1	1	1	0	0	1	0	0	1	0	1
ID1373	1	0	1	1	1	0	1	0	1	1	0	0
ID1374	1	1	1	1	1	1	1	0	1	1	0	1
ID1375	0	0	1	1	1	1	1	0	1	1	0	0
ID1376	0	1	1	1	1	1	1	1	0	1	0	0
ID1377	0	0	1	1	1	1	1	0	1	1	0	0
ID1378	1	1	0	1	1	0	1	0	1	1	1	1
ID1379	0	0	1	1	1	1	1	0	1	0	0	0
ID1380	1	1	1	1	1	0	1	1	1	1	0	1
ID1381	0	1	1	1	1	1	0	1	1	1	0	0
ID1382	1	1	1	1	1	0	0	1	1	1	0	1
ID1383	0	0	1	0	1	1	0	0	0	0	0	0
ID1384	1	0	1	1	1	0	0	0	1	1	0	1
ID1385	1	1	1	1	0	1	1	1	1	1	1	0
ID1386	0	0	1	1	1	0	1	0	0	0	0	0
ID1387	0	1	1	1	1	1	1	1	1	1	0	1
ID1388	1	1	1	1	1	0	0	0	0	0	0	0
ID1389	1	0	1	0	1	1	1	1	0	1	0	1
ID1390	1	1	1	0	1	1	0	0	1	0	0	0
ID1391	1	0	1	1	0	1	1	1	1	1	0	1
ID1392	0	1	1	1	1	1	1	0	1	0	0	0
ID1393	0	0	1	1	0	1	1	0	1	0	0	0
ID1394	1	0	1	1	1	1	1	0	1	1	0	1
ID1395	1	1	1	1	1	1	1	1	1	0	1	0
ID1396	1	0	1	1	0	0	0	0	0	1	0	0
ID1397	0	1	1	1	1	1	0	0	1	0	0	0
ID1398	1	1	1	0	0	0	0	0	1	1	0	1
ID1399	1	1	1	1	1	1	1	0	1	1	0	1
ID1400	0	1	1	0	1	1	1	1	1	1	0	0
ID1401	1	0	1	0	1	1	0	0	1	1	0	1
ID1402	1	1	1	1	0	1	1	0	1	1	0	1
ID1403	1	1	1	1	1	1	1	1	1	1	0	1
ID1404	0	1	1	1	1	1	0	0	1	0	0	0
ID1405	0	0	1	0	1	0	1	0	0	0	0	0
ID1406	0	0	1	1	1	1	1	0	1	1	0	1
ID1407	1	1	1	1	1	1	1	1	1	1	0	0
ID1408	1	1	1	1	1	1	1	0	1	1	0	1
ID1409	1	1	1	0	1	1	1	0	1	1	0	0
ID1410	0	0	1	1	1	1	1	1	1	1	0	1
ID1411	1	1	1	1	1	1	1	1	1	0	0	1
ID1412	1	1	1	1	1	1	1	1	1	1	0	1
ID1413	0	0	1	1	1	1	1	1	1	1	0	1
ID1414	1	1	1	1	1	1	1	1	1	1	0	0
ID1415	1	1	1	1	1	1	1	1	1	1	0	1
ID1416	0	0	1	1	1	1	1	0	0	1	0	0
ID1417	1	1	1	1	1	1	1	0	1	1	0	1
ID1418	1	1	1	1	1	1	1	0	1	1	0	1
ID1419	0	0	1	1	1	1	1	1	0	1	0	0
ID1420	1	1	1	1	1	1	1	0	1	0	0	1
ID1421	0	1	1	1	0	0	1	0	1	0	0	0
ID1422	0	0	0	1	1	0	0	0	1	1	0	0
ID1423	0	0	0	1	0	0	0	0	0	0	0	0
ID1424	1	0	0	1	1	1	0	0	0	1	0	0
ID1425	1	1	1	1	1	1	1	0	1	1	1	1
ID1426	1	0	0	0	1	1	0	0	1	0	0	0
ID1427	0	1	1	1	1	0	0	0	0	0	0	0
ID1428	1	1	0	1	1	1	1	0	1	0	0	1
ID1429	1	0	1	1	1	1	1	1	1	0	0	0
ID1430	0	0	1	1	1	1	1	0	1	1	0	1
ID1431	0	0	1	1	1	0	0	0	0	1	0	0
ID1432	1	1	1	1	1	0	1	1	1	1	0	1
ID1433	1	0	1	1	1	1	1	0	0	1	0	0
ID1434	0	0	1	0	1	1	0	0	1	0	0	0
ID1435	1	1	1	1	0	1	1	1	1	1	0	0
ID1436	0	1	0	0	0	0	1	1	0	1	0	0
ID1437	1	0	0	0	1	0	1	0	1	1	0	0
ID1438	1	1	1	1	1	1	1	1	1	1	0	1
ID1439	1	1	1	1	1	1	1	1	1	1	1	1
ID1440	0	0	1	1	0	0	1	0	1	0	0	0
ID1441	1	0	0	0	1	1	1	1	1	0	0	1
ID1442	1	1	1	1	1	1	1	0	1	0	0	0
ID1443	1	1	1	1	1	1	1	1	1	1	0	1
ID1444	1	0	1	0	0	1	1	0	0	0	0	1
ID1445	0	1	1	1	1	1	1	0	1	0	0	0
ID1446	0	1	1	1	1	1	0	0	1	1	1	0
ID1447	1	1	1	1	1	1	1	0	1	0	0	1
ID1448	1	0	1	1	1	0	1	0	1	1	0	0
ID1449	0	0	1	0	0	0	0	0	0	0	0	0
ID1450	0	0	1	0	0	1	1	0	0	0	0	0
ID1451	0	0	1	1	0	0	0	0	0	0	0	0
ID1452	1	1	1	1	1	0	1	0	1	1	0	1
ID1453	0	0	1	0	0	0	0	0	0	0	0	0
ID1454	0	0	1	1	1	0	1	0	0	0	0	0
ID1455	1	1	1	1	1	1	1	0	1	1	0	1
ID1456	1	1	1	1	1	1	1	1	1	1	1	1
ID1457	0	1	1	1	1	1	1	1	1	0	0	1
ID1458	1	1	1	1	1	1	1	0	1	1	1	1
ID1459	1	1	1	1	1	1	1	1	1	1	1	0
ID1460	1	1	1	1	1	1	1	1	1	1	0	1
ID1461	1	1	1	1	1	1	1	1	1	1	0	1
ID1462	1	1	1	1	1	1	1	1	1	1	1	1
ID1463	1	1	1	1	1	1	1	1	1	1	1	1
ID1464	1	0	1	1	1	1	1	0	1	1	1	1
ID1465	1	1	1	1	1	1	1	0	1	1	0	1
ID1466	1	0	1	1	0	1	0	0	1	0	0	1
ID1467	0	1	0	1	1	0	0	1	1	0	0	1
ID1468	1	0	1	1	1	1	0	1	1	0	0	1
ID1469	1	0	1	1	1	0	0	1	1	0	0	0
ID1470	1	1	1	1	1	1	0	1	0	1	0	1
ID1471	1	1	1	1	1	0	0	0	1	1	0	1
ID1472	1	0	1	1	0	1	1	0	1	1	0	1
ID1473	1	1	1	1	1	1	1	0	1	1	0	1
ID1474	1	1	1	1	1	0	0	0	1	0	0	0
ID1475	1	1	1	1	1	1	1	0	0	1	0	1
ID1476	0	0	1	0	0	1	0	0	0	0	0	0
ID1477	0	0	0	1	1	1	0	0	1	0	0	0
ID1478	1	1	1	1	1	0	1	0	1	1	0	0
ID1479	0	1	0	1	1	0	1	0	0	1	1	0
ID1480	1	1	1	1	1	0	1	0	1	1	1	1
ID1481	1	1	1	1	1	1	1	0	1	1	0	1
ID1482	0	1	1	1	1	1	1	0	1	1	1	1
ID1483	1	1	1	1	1	0	1	1	1	1	1	1
ID1484	0	0	1	1	1	1	1	0	0	0	0	0
ID1485	1	1	0	1	1	1	1	0	1	1	0	1
ID1486	1	1	1	1	1	1	1	0	1	1	0	1
ID1487	1	0	1	1	1	1	1	1	1	1	0	1
ID1488	1	1	1	1	1	1	1	0	1	1	0	1
ID1489	0	0	1	0	1	1	1	0	1	0	0	1
ID1490	1	1	1	1	1	1	1	1	1	1	1	1
ID1491	1	0	1	1	1	1	1	0	1	1	0	0
ID1492	1	1	1	1	1	0	1	0	1	1	0	0
ID1493	1	1	1	1	1	1	1	1	1	1	0	1
ID1494	0	1	1	1	1	1	1	0	1	1	0	1
ID1495	1	1	1	1	1	1	1	1	1	1	0	1
ID1496	1	1	1	1	1	1	0	0	1	1	0	1
ID1497	1	1	0	1	1	1	1	1	1	1	1	1
ID1498	1	1	1	1	1	1	0	0	1	1	0	0
ID1499	1	1	1	1	1	1	1	1	1	1	0	1
ID1500	1	0	1	1	1	1	1	0	1	1	0	0
ID1501	1	1	1	1	1	1	1	1	1	1	0	0
ID1502	1	1	1	1	1	1	1	0	1	1	0	1
ID1503	1	1	1	1	0	1	1	0	1	0	0	1
ID1504	0	0	1	1	1	1	0	0	0	1	0	0
ID1505	1	0	1	1	1	1	0	0	1	1	0	1
ID1506	1	1	1	1	1	1	1	0	1	0	0	1
ID1507	1	1	1	1	1	1	1	1	1	1	0	1
ID1508	1	1	1	1	1	1	1	1	1	1	1	1
ID1509	0	0	1	1	1	1	0	0	1	1	0	1
ID1510	0	0	1	1	1	0	1	0	0	0	0	0
ID1511	0	0	1	1	1	0	1	0	1	1	0	1
ID1512	1	0	1	1	1	0	1	0	1	1	0	0
ID1513	0	1	1	1	1	1	1	0	1	1	0	1
ID1514	0	1	1	1	1	0	1	0	1	1	0	0
ID1515	1	0	1	1	0	1	1	0	1	0	0	0
ID1516	1	1	1	1	1	1	1	1	1	1	1	1
ID1517	1	0	1	1	1	0	1	0	1	1	0	0
ID1518	0	0	1	1	1	0	1	0	0	1	0	0
ID1519	1	1	1	1	1	1	1	1	1	0	0	0
ID1520	0	0	0	0	1	0	1	0	1	0	0	0
ID1521	0	0	1	1	0	0	0	0	1	1	0	0
ID1522	0	0	1	1	1	1	1	0	0	0	0	0
ID1523	0	0	1	0	0	0	0	0	0	0	0	0
ID1524	0	0	1	1	1	0	0	0	0	0	0	1
ID1525	1	0	1	1	1	0	0	0	1	1	0	1
ID1526	0	0	1	1	1	1	0	0	0	0	0	0
ID1527	1	0	1	1	0	1	1	1	1	1	0	0
ID1528	0	0	1	1	0	0	1	0	0	0	0	0
ID1529	0	0	0	1	0	0	0	0	1	1	0	1
ID1530	0	0	0	1	1	1	0	0	0	1	0	0
ID1531	0	0	1	0	1	0	0	0	1	0	0	0
ID1532	0	0	1	0	1	0	1	0	0	0	0	0
ID1533	0	1	1	1	1	1	1	1	1	1	0	1
ID1534	0	0	1	1	1	1	0	0	1	1	0	0
ID1535	0	0	0	0	0	0	0	0	0	0	0	1
ID1536	0	0	1	1	1	0	1	0	1	0	0	0
ID1537	1	1	1	1	1	1	1	1	1	1	1	1
ID1538	1	1	1	1	1	1	1	1	1	1	0	0
ID1539	0	0	1	0	0	0	0	0	0	0	0	0
ID1540	0	1	1	1	1	1	1	1	0	1	0	1
ID1541	0	0	1	1	0	1	1	0	0	0	0	0
ID1542	0	0	0	1	1	1	1	0	0	0	0	0
ID1543	0	0	0	1	1	1	1	0	0	1	0	0
ID1544	1	1	1	1	1	1	1	0	1	1	0	0
ID1545	1	1	1	1	1	1	1	0	0	1	0	1
ID1546	0	1	1	1	1	0	0	0	0	1	0	1
ID1547	1	1	0	0	1	1	1	1	1	1	0	0
ID1548	0	0	0	0	1	1	1	0	0	1	1	0
ID1549	1	0	1	0	1	0	1	0	1	1	0	1
ID1550	1	1	1	0	1	0	0	0	1	0	0	1
ID1551	0	1	0	1	0	0	0	0	1	0	0	0
ID1552	0	0	0	0	1	0	0	0	0	0	0	0
ID1553	1	0	1	0	1	0	0	0	0	0	0	0
ID1554	1	0	0	1	1	0	0	1	1	1	0	1
ID1555	1	1	1	1	1	1	1	1	1	1	0	0
ID1556	0	1	1	1	1	0	1	1	1	1	0	1
ID1557	0	1	0	1	1	1	1	0	0	1	0	1
ID1558	0	1	1	1	1	1	1	1	1	1	0	1
ID1559	1	1	1	1	1	1	1	1	1	1	0	1
ID1560	1	1	1	1	1	1	1	1	1	1	0	1
ID1561	1	1	1	1	1	1	1	0	1	1	0	1
ID1562	1	1	1	1	1	1	1	1	1	1	1	1
ID1563	0	1	1	1	1	1	0	1	1	0	0	1
ID1564	1	1	1	1	1	1	1	1	1	1	0	1
ID1565	1	1	1	1	1	1	1	1	1	1	0	1
ID1566	1	1	1	1	1	1	1	1	1	1	1	1
ID1567	1	0	1	1	1	1	1	1	1	1	1	1
ID1568	1	1	1	1	1	1	1	1	1	1	0	0
ID1569	1	1	1	1	0	0	0	0	0	0	0	0
ID1570	0	0	1	1	1	1	1	0	1	0	0	0
ID1571	0	1	1	1	1	1	1	1	1	1	0	0
ID1572	0	1	1	1	1	1	1	0	0	0	0	1
ID1573	0	0	1	1	0	0	0	0	0	0	0	0
ID1574	0	0	0	0	0	0	0	0	0	0	0	0
ID1575	0	0	1	0	0	1	1	0	0	1	0	0
ID1576	0	1	1	0	1	1	1	0	1	1	1	1
ID1577	1	1	1	0	1	1	1	1	1	1	0	0
ID1578	0	0	0	1	1	0	1	0	1	1	0	0
ID1579	1	1	1	1	1	0	1	0	1	1	0	1
ID1580	0	0	1	1	1	1	1	0	0	0	0	0
ID1581	0	0	1	1	0	0	1	0	1	1	1	0
ID1582	1	1	1	1	1	1	1	0	1	0	0	1
ID1583	0	0	1	0	1	0	0	0	0	0	0	0
ID1584	0	0	0	0	0	0	1	0	0	0	0	0
ID1585	0	0	1	1	1	1	1	0	1	1	0	1
ID1586	1	0	1	1	1	1	1	1	1	1	1	0
ID1587	0	1	1	1	1	0	1	0	1	1	0	1
ID1588	0	0	1	1	0	0	0	0	0	0	0	0
ID1589	1	1	1	1	1	1	0	1	1	1	0	1
ID1590	0	1	1	1	1	1	0	0	1	0	0	0
ID1591	0	1	1	0	1	0	1	0	1	1	0	1
ID1592	0	1	1	1	1	1	1	0	1	1	0	1
ID1593	0	1	1	1	1	0	1	0	0	0	0	0
ID1594	1	0	0	1	1	1	1	0	1	0	0	0
ID1595	0	0	1	0	0	0	0	0	0	0	0	0
ID1596	1	1	1	1	1	1	1	0	0	1	0	0
ID1597	1	0	1	1	1	0	1	1	1	1	0	1
ID1598	1	0	1	1	0	1	0	0	0	1	0	0
ID1599	0	0	1	1	1	0	0	0	0	0	0	0
ID1600	1	1	1	1	1	1	1	1	1	1	0	1
ID1601	0	1	1	1	1	1	1	1	1	1	0	0
ID1602	1	0	1	1	1	1	1	1	1	1	1	1
ID1603	1	0	1	1	1	1	1	1	1	1	0	1
ID1604	1	1	1	1	1	1	0	1	1	1	1	1
ID1605	1	1	1	1	1	1	1	1	1	1	0	0
ID1606	1	1	1	1	1	1	1	1	1	1	0	1
ID1607	1	1	1	1	1	1	1	0	1	1	0	1
ID1608	0	0	0	1	0	0	0	0	0	0	0	0
ID1609	0	1	1	1	1	1	1	0	0	1	0	1
ID1610	1	1	1	0	1	0	1	0	0	1	0	0
ID1611	0	0	1	1	1	0	0	0	1	0	0	0
ID1612	1	0	1	0	0	0	1	0	1	1	0	1
ID1613	0	0	0	1	1	0	0	0	0	0	0	0
ID1614	0	0	0	0	1	0	0	0	0	0	0	0
ID1615	0	1	1	1	1	1	1	0	0	1	0	1
ID1616	1	0	1	1	1	0	1	0	0	0	0	0
ID1617	1	1	1	1	1	1	1	1	0	1	1	0
ID1618	0	0	1	1	0	0	0	0	0	1	0	0
ID1619	1	1	1	1	0	1	1	0	1	1	0	1
ID1620	0	0	1	1	1	1	1	0	1	1	0	1
ID1621	1	1	1	1	1	0	0	0	1	1	0	1
ID1622	0	0	1	1	1	1	1	0	1	0	0	0
ID1623	1	0	1	1	1	0	0	0	0	1	0	0
ID1624	0	0	1	1	1	0	1	0	0	0	0	1
ID1625	0	0	1	1	1	1	1	0	0	0	0	1
ID1626	0	0	1	1	0	0	0	0	0	0	0	0
ID1627	0	0	1	0	1	1	0	0	0	0	0	0
ID1628	1	1	0	1	1	1	1	0	1	1	0	1
ID1629	1	1	1	1	1	1	1	0	1	1	1	0
ID1630	0	1	0	0	0	0	1	0	0	1	0	1
ID1631	1	1	1	1	1	1	1	0	1	0	0	0
ID1632	0	0	1	0	1	0	0	0	1	0	0	0
ID1633	1	1	1	1	1	1	1	0	1	0	0	1
ID1634	0	0	1	0	0	1	1	0	1	1	0	1
ID1635	1	0	1	1	1	1	0	0	1	1	0	0
ID1636	0	0	1	1	0	1	1	0	0	1	0	1
ID1637	0	1	1	1	1	0	1	0	0	1	0	0
ID1638	0	0	1	1	0	0	0	0	0	0	0	0
ID1639	1	0	1	1	1	1	1	1	0	1	0	1
ID1640	0	1	1	1	1	1	1	0	1	1	0	1
ID1641	0	0	1	1	1	1	1	0	0	1	0	1
ID1642	1	0	1	1	1	1	1	0	0	1	0	1
ID1643	0	0	1	1	1	0	1	0	0	0	0	0
ID1644	1	1	0	0	0	0	0	1	0	0	0	0
ID1645	1	0	1	1	1	1	1	0	1	1	0	0
ID1646	1	1	1	1	1	1	1	0	1	1	1	0
ID1647	1	1	1	1	1	1	1	1	1	1	0	0
ID1648	1	1	1	1	0	1	1	1	1	1	0	0
ID1649	1	1	1	1	1	1	1	1	1	1	0	1
ID1650	0	0	1	1	1	0	0	0	1	0	0	0
ID1651	1	1	1	0	1	1	1	1	1	1	0	1
ID1652	1	1	1	1	1	1	1	1	1	1	1	1
ID1653	1	1	1	1	1	1	1	0	1	1	0	1
ID1654	1	1	1	1	1	1	1	1	1	1	1	0
ID1655	1	1	1	1	1	1	1	1	1	1	1	1
ID1656	1	1	1	1	1	1	1	0	1	1	0	1
ID1657	1	1	1	1	1	1	1	0	1	1	1	1
ID1658	1	1	1	1	1	0	1	1	1	1	0	1
ID1659	0	0	1	1	0	0	1	0	0	0	0	0
ID1660	1	0	1	1	1	1	1	0	1	1	0	0
ID1661	1	1	1	1	1	0	0	0	1	1	0	1
ID1662	1	0	1	1	1	0	0	0	0	1	0	1
ID1663	0	0	1	1	1	0	0	0	1	0	0	0
ID1664	0	0	0	0	0	0	0	0	0	1	0	0
ID1665	1	1	1	1	0	0	0	0	1	1	0	0
ID1666	0	0	1	0	1	0	1	1	1	1	0	0
ID1667	0	0	1	0	1	0	0	0	1	0	0	0
ID1668	0	0	1	0	1	1	1	0	0	1	0	1
ID1669	1	1	1	1	1	1	1	1	1	1	1	1
ID1670	1	0	1	1	1	1	0	0	1	1	0	1
ID1671	1	0	0	1	0	0	1	0	1	0	0	0
ID1672	1	1	1	1	0	0	1	0	1	1	0	0
ID1673	1	1	1	0	1	1	1	0	1	1	0	0
ID1674	1	1	1	1	1	1	1	1	1	0	0	1
ID1675	1	1	1	1	1	1	1	1	1	1	0	1
ID1676	1	0	1	1	1	1	1	1	1	1	0	1
ID1677	1	0	1	1	1	1	1	1	1	1	0	1
